# Supplementary material for: Theoretical Prediction for Synthetic Realization: Pyramidal Systems ClE[E′4R4] (E = B–Ga, E′ = C–Ge, R = SiMe3, SiMetBu2): A DFT Study
Source: Hindawi journal article supplement (doi:10.1155/2019/3659287), 2019-07-22
Supplement: f1 [file 3659287.f1.docx]

**SUPPORTING INFORMATION**

**Theoretical prediction for synthetic realization: structure of pyramidal systems ClE[E′4R4] (E = B–Ga, E′ = C–Ge, R = SiMe3, SiMe*t*Bu2), a DFT study**

**Olga A. Gapurenko,1 Vladimir Ya. Lee,2* Ruslan M. Minyaev,1* Vladimir I. Minkin1**

1 *Institute of Physical and Organic Chemistry, Southern Federal University, 344090 Rostov on Don, Russian Federation. E-mail: minyaev@ipoc.sfedu.ru*

2 *Department of Chemistry, Graduate School of Pure and Applied Sciences, University of Tsukuba, Tsukuba 305–8571, Ibaraki, Japan. E-mail:* [*leevya@chem.tsukuba.ac.jp*](mailto:leevya@chem.tsukuba.ac.jp)

**Contents of the Supporting Information:**

1. Minima geometries of systems **4–9** (Figure S1) S2
2. Minima geometries of systems **8′** and **9′** (Figure S2) S2
3. Cartesain coordinates for the optimized geometries S3-S26

**Figure S1** Optimized geometries (bond lengths are in Å) of minima structures **4–9**

**Figure S2** Optimized geometries (bond lengths are in Å) of minima structures **8**′ and **9**′. Hydrogen atoms are omitted

**Cartesain coordinates of the optimized geometries (B3LYP/Def2TZVP):** structure, symmetry, number of imaginary frequencies (NI), smallest harmonic vibrational frequency (*ω*1, cm-1), and electronic energy (E, a.u.)

| **1**, ClB[C4H4], *C*4*v*, NI = 0, *ω*1 = 233, E = -639.916436  C,0,0.,1.0346219505,-1.0533804207  C,0,-1.0346219505,0.,-1.0533804207  C,0,1.0346219505,0.,-1.0533804207  C,0,0.,-1.0346219505,-1.0533804207  B,0,0.,0.,0.21929511  H,0,-2.1072464932,0.,-0.9758689445  H,0,0.,2.1072464932,-0.9758689445  H,0,2.1072464932,0.,-0.9758689445  H,0,0.,-2.1072464932,-0.9758689445  Cl,0,0.,0.,1.9839709126 | |
| --- | --- |
| **2**, ClAl[C4H4], *Cs*, NI = 0, *ω*1 = 87, E =  -857.532233  C,0,1.8437958373,0.3954430867,-0.6936692691  C,0,1.8437958373,0.3954430867,0.6936692691  C,0,0.7035018398,1.3267544795,-0.8058145087  C,0,0.7035018398,1.3267544795,0.8058145087  Al,0,-0.3545634636,-0.0613644586,0.  H,0,2.3522306714,-0.2163698574,1.4279734815  H,0,2.3522306714,-0.2163698574,-1.4279734815  H,0,0.5862636087,2.1869043069,-1.446581595  H,0,0.5862636087,2.1869043069,1.446581595  Cl,0,-1.273960426,-1.9425721239,0. | **2**, ClAl[C4H4], *C*4*v*, NI = 2, *ω*1 = *i*167, E = -857.529288    C,0,0.,1.0424711264,-1.5744100878  C,0,-1.0424711264,0.,-1.5744100878  C,0,1.0424711264,0.,-1.5744100878  C,0,0.,-1.0424711264,-1.5744100878  Al,0,0.,0.,0.15832322  H,0,-2.1111022493,0.,-1.7067005354  H,0,0.,2.1111022493,-1.7067005354  H,0,2.1111022493,0.,-1.7067005354  H,0,0.,-2.1111022493,-1.7067005354  Cl,0,0.,0.,2.2423012853 |
| **3**, ClGa[C4H4], *Cs*, NI = 0, *ω*1 = 59, E = -2539.954398  C,0,-0.130428852,1.0323203124,-1.6888944408  C,0,-1.1083751107,0.0366878057,-1.658750186  C,0,0.9627512079,0.1199253748,-1.4810178056  C,0,-0.1700474071,-1.0334751434,-1.4461456147  Ga,0,0.5239325966,-0.5254115064,0.4161020168  H,0,-2.189396931,0.0656521038,-1.6649796856  H,0,-0.1796969762,2.1119719655,-1.7270280973  H,0,1.932437012,0.0883165712,-1.9565584158  H,0,-0.1345800938,-2.0164222563,-1.8933702961  Cl,0,-0.1942118657,0.2381773115,2.3269395252 | **3**, ClGa[C4H4], *C*4*v*, NI = 2, *ω*1 = *i*194, E = -2539.932173  C,0,0.,-1.044608041,1.7874178527  C,0,-1.044608041,0.,1.7874178527  C,0,1.044608041,0.,1.7874178527  C,0,0.,1.044608041,1.7874178527  Ga,0,0.,0.,0.0034917066  H,0,-2.1128341364,0.,1.9181061039  H,0,0.,-2.1128341364,1.9181061039  H,0,2.1128341364,0.,1.9181061039  H,0,0.,2.1128341364,1.9181061039  Cl,0,0.,0.,-2.1153591948 |
| **4**, ClB[Si4H4], *Cs*, NI = 0, *ω*1 = 106, E = -1645.526165  B,0,-0.0366247882,0.,0.7525123891  Si,0,0.0144560015,1.5262112655,-0.5588419863  Si,0,-1.5976456487,0.,-0.8491346127  Si,0,0.0144560015,-1.5262112655,-0.5588419863  Si,0,1.7040943684,0.,-1.0820829715  H,0,-0.0407787985,2.9639669171,-0.2412316585  H,0,2.6455930402,0.,0.0870366407  H,0,-0.0407787985,-2.9639669171,-0.2412316585  H,0,-3.06159567,0.,-0.6305002213  Cl,0,0.1253140137,0.,2.5308560679 | **4**, ClB[Si4H4], *C*4*v*, NI = 3, *ω*1 = *i*247, E = -1645.521738  B,0,0.,0.,-0.5987137452  Si,0,-1.1247095363,-1.1247095363,0.799256014  Si,0,-1.1247095363,1.1247095363,0.799256014  Si,0,1.1247095363,1.1247095363,0.799256014  Si,0,1.1247095363,-1.1247095363,0.799256014  H,0,-2.0777791465,-2.0777791465,0.202395815  H,0,2.0777791465,-2.0777791465,0.202395815  H,0,2.0777791465,2.0777791465,0.202395815  H,0,-2.0777791465,2.0777791465,0.202395815  Cl,0,0.,0.,-2.399955374 |
| **5**, ClAl[Si4H4], *C*1, NI = 0, *ω*1 = 101, E = -1863.187174  Si,0,0.0418421916,0.9540392111,1.6269520122  Si,0,-1.4446385968,1.4408237954,-0.0101718237  Si,0,0.1368694154,1.2122373264,-1.595988481  Si,0,1.8769903937,0.8998643233,0.0079908343  H,0,0.1072569216,1.4014937529,3.0373404994  H,0,1.9354373557,-0.6686896738,-0.0544392635  H,0,-0.1041618402,0.3570578418,-2.7950602267  H,0,-2.8416270672,1.9566906785,-0.0077440897  Al,0,-0.0598790368,-0.8120636489,0.0589047127  Cl,0,-0.4307417368,-2.8485966069,-0.3218863568 | **5**, ClAl[Si4H4], *C*4*v*, NI = 3, *ω*1 = *i*410, E = -1863.168810  Si,0,-1.1376576965,-1.1376576965,1.1267737817  Si,0,-1.1376576965,1.1376576965,1.1267737817  Si,0,1.1376576965,1.1376576965,1.1267737817  Si,0,1.1376576965,-1.1376576965,1.1267737817 H,0,-2.1593733583,-2.1593733583,0.8389178096  H,0,2.1593733583,-2.1593733583,0.8389178096  H,0,2.1593733583,2.1593733583,0.8389178096  H,0,-2.1593733583,2.1593733583,0.8389178096  Al,0,0.,0.,-0.815140832  Cl,0,0.,0.,-2.9265019792 |
| **6**, ClGa[Si4H4], *C*1, NI = 0, *ω*1 = 44, E = -3545.615274  Si,0,-0.027618186,-1.1263473738,1.6021646536  Si,0,1.6036545009,-1.2688030065,-0.0450815575  Si,0,-0.0469332607,-1.4142134586,-1.6510598902  Si,0,-1.660867468,-1.2688140533,-0.0194511134  H,0,-0.019209537,-1.5444593553,3.025575418  H,0,-2.6888491208,-0.188690101,-0.0935044899  H,0,-0.0423617399,-0.4201081849,-2.7651932712  H,0,2.9838906555,-1.8115366434,-0.0086795196  Ga,0,0.2728139708,0.7339410636,0.0986358061  Cl,0,0.016220185,2.8312831133,-0.3384060359 | **6**, ClGa[Si4H4], *C*4*v*, NI = 3, *ω*1 = *i*397, E = -3545.597699  Si,0,0.,-1.6134804543,1.3646722413  Si,0,-1.6134804543,0.,1.3646722413  Si,0,0.,1.6134804543,1.3646722413  Si,0,1.6134804543,0.,1.3646722413  H,0,0.,-3.0556305849,1.0657500778  H,0,3.0556305849,0.,1.0657500778  H,0,0.,3.0556305849,1.0657500778  H,0,-3.0556305849,0.,1.0657500778  Ga,0,0.,0.,-0.5637079231  Cl,0,0.,0.,-2.7244735065 |
| **7**, ClB[Ge4H4], *Cs*, NI = 0, *ω*1 = 74, E = -8795.699436  B,0,-0.004985098,0.,1.3028939242  Ge,0,0.0383743328,1.5771777644,-0.0325623735  Ge,0,-1.6765603259,0.,-0.5407994728  Ge,0,0.0383743328,-1.5771777644,-0.0325623735  Ge,0,1.8389976288,0.,-0.9136781482  H,0,-0.1618680213,3.0717625106,0.2307625506  H,0,2.713800726,0.,0.4139199842  H,0,-0.1618680213,-3.0717625106,0.2307625506  H,0,-3.2199427007,0.,-0.4111337178  Cl,0,0.2198120041,0.,3.0550620783 | **7**, ClB[Ge4H4], *C*4*v*, NI = 3, *ω*1 = *i*376, E = -8795.677976  B,0,0.,0.,-1.0628831336  Ge,0,1.1877298485,1.1877298485,0.3776596729  Ge,0,1.1877298485,-1.1877298485,0.3776596729  Ge,0,-1.1877298485,-1.1877298485,0.3776596729  Ge,0,-1.1877298485,1.1877298485,0.3776596729  H,0,2.1442346197,2.1442346197,-0.3351172049  H,0,-2.1442346197,2.1442346197,-0.3351172049  H,0,-2.1442346197,-2.1442346197,-0.3351172049  H,0,2.1442346197,-2.1442346197,-0.3351172049  Cl,0,0.,0.,-2.8576797784 |
| **8**, ClAl[Ge4H4], *C*1, NI = 0, *ω*1 = 44, E = -9013.382399  Ge,0,-0.0079194212,1.1791042959,-1.1660048736  Ge,0,-1.7193088937,-0.3636342932,0.2530570265  Ge,0,-0.0035596974,-1.6440476822,-0.7829082272  Ge,0,1.729211912,-0.6282387645,0.4671681835  H,0,0.1428361512,1.9154438906,0.3866722671  H,0,3.0556153953,-0.3507464849,-0.2761150485  H,0,0.054199813,-2.1477994114,-2.2496577405  H,0,-3.1972906656,-0.5253223108,-0.1192918523  Al,0,-0.0232267362,0.6905799376,1.6533239326  Cl,0,-0.0305578574,1.6785653006,3.5136633347 | **8**, ClAl[Ge4H4], *C*4*v*, NI = 3, *ω*1 = *i*497, E = -9013.339151  Ge,0,-1.1975745124,-1.1975745124,-0.5405727617  Ge,0,1.1975745124,-1.1975745124,-0.5405727617  Ge,0,1.1975745124,1.1975745124,-0.5405727617  Ge,0,-1.1975745124,1.1975745124,-0.5405727617  H,0,-2.2398447513,-2.2398447513,-0.1426890018  H,0,-2.2398447513,2.2398447513,-0.1426890018  H,0,2.2398447513,2.2398447513,-0.1426890018  H,0,2.2398447513,-2.2398447513,-0.1426890018  Al,0,0.,0.,1.4236545508  Cl,0,0.,0.,3.5373697804 |
| **9**, ClB[Ge4H4], *C*1, NI = 0, *ω*1 = 33, E = -10695.836343  Ge,0,0.4951541361,0.7141060748,-1.7372959816  Ge,0,-1.5189718412,-0.2086580348,0.2225041401  Ge,0,-0.0343605879,-2.0056181527,-0.8121925918  Ge,0,1.6528846078,-0.4509396715,0.2384525499  H,0,-1.0276228479,1.0425543802,-0.9206760889  H,0,3.1809833814,-0.3841255116,0.0338441266  H,0,-0.0585315839,-0.8334984299,-2.2626578431  H,0,-3.0319576726,-0.0253421554,-0.0744552628  Ga,0,0.1754403067,0.6028097475,1.8344847405  Cl,0,0.1669821014,1.3766647533,3.8650402111 | **9**, ClB[Ge4H4], *C*4*v*, NI = 3, *ω*1 = *i*499, E = -10695.769560  Ge,0,-1.2014824299,-1.2014824299,-0.7362634389  Ge,0,1.2014824299,-1.2014824299,-0.7362634389  Ge,0,1.2014824299,1.2014824299,-0.7362634389  Ge,0,-1.2014824299,1.2014824299,-0.7362634389  H,0,-2.2403328634,-2.2403328634,-0.3206882458  H,0,-2.2403328634,2.2403328634,-0.3206882458  H,0,2.2403328634,2.2403328634,-0.3206882458  H,0,2.2403328634,-2.2403328634,-0.3206882458  Ga,0,0.,0.,1.2186323649  Cl,0,0.,0.,3.3851808615 |
| **1′**, ClB[C4(SiMe3)4], *C*2, NI = 0, *ω*1 = 39, E = -2274.946091  C,0,-0.4489117018,0.9564372948,-0.3037636073  C,0,-0.9532878341,-0.4477401813,-0.3130507936  C,0,0.9532878341,0.4477401813,-0.3130507936  C,0,0.4489117018,-0.9564372948,-0.3037636073  B,0,0.,0.,0.9468863743  Si,0,-2.6501926619,-1.2202155687,-0.5937970792  Si,0,-1.2327867928,2.6475458006,-0.0123614447  Si,0,2.6501926619,1.2202155687,-0.5937970792  Si,0,1.2327867928,-2.6475458006,-0.0123614447  C,0,-2.4691105558,-2.8594469908,-1.5054646677  H,0,-1.891317673,-2.7302305645,-2.4233202275  H,0,-2.0008230724,-3.6498400386,-0.9217463037  H,0,-3.4636766705,-3.2125797438,-1.7921001101  C,0,-3.6089718249,-1.4731470002,1.0037525361  H,0,-3.0745520095,-2.1408976126,1.6828490488  H,0,-3.7695077446,-0.5304990833,1.5298063401  H,0,-4.588420307,-1.9146476959,0.8014305369  C,0,-3.6108797555,-0.1214004015,-1.7866127743  H,0,-4.5721743766,-0.5880293773,-2.0187724761  H,0,-3.815849862,0.8772989848,-1.4051391606  H,0,-3.0628156054,-0.0125621869,-2.7256298914  C,0,3.6108797555,0.1214004015,-1.7866127743  H,0,4.5721743766,0.5880293773,-2.0187724761  H,0,3.815849862,-0.8772989848,-1.4051391606  H,0,3.0628156054,0.0125621869,-2.7256298914  C,0,3.6089718249,1.4731470002,1.0037525361  H,0,3.0745520095,2.1408976126,1.6828490488  H,0,3.7695077446,0.5304990833,1.5298063401  H,0,4.588420307,1.9146476959,0.8014305369  C,0,2.4691105558,2.8594469908,-1.5054646677  H,0,1.891317673,2.7302305645,-2.4233202275  H,0,2.0008230724,3.6498400386,-0.9217463037  H,0,3.4636766705,3.2125797438,-1.7921001101  C,0,-0.141203899,3.6748887139,1.1292108831  H,0,-0.043484469,3.1874780652,2.1015691396  H,0,0.8609886954,3.8571676457,0.7456138894  H,0,-0.6098412993,4.6492526419,1.2934148689  C,0,-2.8689512628,2.4664779682,0.9046132224  H,0,-3.6467229179,1.9567159002,0.338607473  H,0,-2.7282789578,1.9320009713,1.8464885359  H,0,-3.2458111507,3.4638394424,1.1482030686  C,0,-1.5015596892,3.5343312482,-1.6494753692  H,0,-2.1494862933,2.9564269466,-2.3120018942  H,0,-1.9712855407,4.5085377727,-1.4908294951  H,0,-0.5577579319,3.7015752299,-2.171918062  C,0,0.141203899,-3.6748887139,1.1292108831  H,0,0.043484469,-3.1874780652,2.1015691396  H,0,-0.8609886954,-3.8571676457,0.7456138894  H,0,0.6098412993,-4.6492526419,1.2934148689  C,0,2.8689512628,-2.4664779682,0.9046132224  H,0,3.6467229179,-1.9567159002,0.338607473  H,0,2.7282789578,-1.9320009713,1.8464885359  H,0,3.2458111507,-3.4638394424,1.1482030686  C,0,1.5015596892,-3.5343312482,-1.6494753692  H,0,2.1494862933,-2.9564269466,-2.3120018942  H,0,1.9712855407,-4.5085377727,-1.4908294951  H,0,0.5577579319,-3.7015752299,-2.171918062  Cl,0,0.,0.,2.7223719441 | |
| **2′**, ClAl[C4(SiMe3)4], *C*4, NI = 0, *ω*1 = 15, E = -2492.564146  C,0,-0.0423679226,1.0642998476,0.1010523406  C,0,-1.0642878679,-0.0423716798,0.1011278871  C,0,1.0642878679,0.0423716798,0.1011278871  C,0,0.0423679226,-1.0642998476,0.1010523406  Al,0,0.,0.,1.8090969881  Si,0,-2.9167804788,-0.0574098969,-0.2176970426  Si,0,-0.0576533089,2.9169939592,-0.2167091859  Si,0,2.9167804788,0.0574098969,-0.2176970426  Si,0,0.0576533089,-2.9169939592,-0.2167091859  C,0,-3.6954540217,-1.7680729015,-0.0814551843  H,0,-3.2493862956,-2.5154988337,-0.736056288  H,0,-3.6770183638,-2.1500050801,0.9403787313  H,0,-4.7470717086,-1.6723985071,-0.3678567562  C,0,-3.857559513,0.9909945848,1.0368028608  H,0,-3.7649800831,0.5562886626,2.0356824359  H,0,-3.5234479983,2.0245146256,1.0912468528  H,0,-4.9217056235,1.0020848039,0.7842177423  C,0,-3.239434471,0.5486896867,-1.9753670986  H,0,-4.3127396599,0.5949136548,-2.1786022022  H,0,-2.8217085797,1.5381789234,-2.164321051  H,0,-2.7938902305,-0.1368381865,-2.7005483079  C,0,3.239434471,-0.5486896867,-1.9753670986  H,0,4.3127396599,-0.5949136548,-2.1786022022  H,0,2.8217085797,-1.5381789234,-2.164321051  H,0,2.7938902305,0.1368381865,-2.7005483079  C,0,3.857559513,-0.9909945848,1.0368028608  H,0,3.7649800831,-0.5562886626,2.0356824359  H,0,3.5234479983,-2.0245146256,1.0912468528  H,0,4.9217056235,-1.0020848039,0.7842177423  C,0,3.6954540217,1.7680729015,-0.0814551843  H,0,3.2493862956,2.5154988337,-0.736056288  H,0,3.6770183638,2.1500050801,0.9403787313  H,0,4.7470717086,1.6723985071,-0.3678567562  C,0,0.991549767,3.8571321686,1.0376080008  H,0,0.5586264043,3.7627292253,2.0370849971  H,0,2.0255598001,3.5241829671,1.0898249052  H,0,1.0009414043,4.9216194777,0.7863775517  C,0,-1.7681935197,3.6956921202,-0.078983896  H,0,-2.5161360469,3.2500872187,-0.7332864086  H,0,-2.1495043537,3.6770637458,0.9430757071  H,0,-1.6723784134,4.7473953099,-0.3650696987  C,0,0.5474602924,3.240687833,-1.9745097434  H,0,-0.1388700857,2.7962639397,-2.6996248403  H,0,0.5945991017,4.3140742544,-2.1770471716  H,0,1.53645015,2.8221385964,-2.1643352133  C,0,-0.991549767,-3.8571321686,1.0376080008  H,0,-0.5586264043,-3.7627292253,2.0370849971  H,0,-2.0255598001,-3.5241829671,1.0898249052  H,0,-1.0009414043,-4.9216194777,0.7863775517  C,0,1.7681935197,-3.6956921202,-0.078983896  H,0,2.5161360469,-3.2500872187,-0.7332864086  H,0,2.1495043537,-3.6770637458,0.9430757071  H,0,1.6723784134,-4.7473953099,-0.3650696987  C,0,-0.5474602924,-3.240687833,-1.9745097434  H,0,0.1388700857,-2.7962639397,-2.6996248403  H,0,-0.5945991017,-4.3140742544,-2.1770471716  H,0,-1.53645015,-2.8221385964,-2.1643352133  Cl,0,0.,0.,3.8949208194 | |
| **3′**, ClGa[C4(SiMe3)4], *C*1, NI = 0, *ω*1 = 14, E = -4174.976178  C,0,-0.0173307404,1.0037851371,-0.3262980932  C,0,-1.0861418412,0.0853739225,-0.0448111471  C,0,1.0087051069,-0.0175422369,-0.331452335  C,0,0.0857064821,-1.094223285,-0.0750200651  Ga,0,-0.3806785672,-0.4844283259,1.8726094761  Si,0,-0.0444301999,-2.8853614227,-0.659243037  Si,0,2.8997173787,-0.0374110725,-0.4920175803  Si,0,-2.9446607631,0.074460246,-0.3816273745  Si,0,0.0854198214,2.8703043292,-0.6499205984  C,0,0.9653360086,3.1133274091,-2.3017498017  H,0,0.3532008867,2.7180382682,-3.1161995261  H,0,1.1225767406,4.1782236603,-2.4932364579  H,0,1.9361246256,2.6213287736,-2.3537602256  C,0,0.9595992082,3.7818866244,0.7461498673  H,0,1.9900673742,3.4691266688,0.8985613389  H,0,0.9633902521,4.8544886382,0.5313236259  H,0,0.4282529035,3.635099992,1.6890766475  C,0,-1.5914642736,3.7119247323,-0.8141988821  H,0,-2.269795304,3.226889267,-1.5151675135  H,0,-2.0975664017,3.8089970629,0.1464941999  H,0,-1.412694811,4.72569149,-1.1846021543  C,0,-3.2939065924,0.4063221808,-2.2066783482  H,0,-2.8280754889,-0.3469249842,-2.8450685209  H,0,-4.3704059354,0.381341755,-2.3968581484  H,0,-2.9242371639,1.3807254086,-2.5286025252  C,0,-3.8490161506,1.3341673756,0.6879525479  H,0,-3.6777835449,1.1337615378,1.7481214911  H,0,-3.5642553952,2.3650570486,0.4911608795  H,0,-4.9242173662,1.2501115106,0.5056610469  C,0,-3.7240737359,-1.5842769939,0.0560400213  H,0,-3.3842356656,-2.410166806,-0.5674588497  H,0,-3.5646033252,-1.8552178641,1.1015040759  H,0,-4.8040750585,-1.4914232273,-0.0897776888  C,0,3.3704665907,-0.4859114145,-2.263826986  H,0,3.0338134899,0.2865090053,-2.9594246061  H,0,4.4563179071,-0.5679039071,-2.3616522775  H,0,2.9347638983,-1.4304722798,-2.591108019  C,0,3.7264539214,1.6053411051,-0.0872098531  H,0,3.4285140586,2.4350112851,-0.7263471136  H,0,3.5566984096,1.8913815099,0.9518157502  H,0,4.8047718296,1.4698596379,-0.2140413349  C,0,3.6227988491,-1.2529299438,0.7497600677  H,0,3.3933184388,-0.9262181275,1.766729673  H,0,3.2625882991,-2.2721715767,0.6350796011  H,0,4.7114532671,-1.2726772462,0.6478767448  C,0,-0.8657460336,-2.8973424544,-2.35893171  H,0,-0.2785101803,-2.3188711156,-3.0759887573  H,0,-0.931271051,-3.9220319081,-2.7345666955  H,0,-1.8748704184,-2.4857328284,-2.3508750174  C,0,1.613644641,-3.7596054122,-0.8485792884  H,0,2.3260659714,-3.2379592594,-1.4859721173  H,0,2.0901357451,-3.9517629385,0.1133430079  H,0,1.4160826118,-4.7324893864,-1.3087236859  C,0,-1.0131621229,-3.9455155954,0.5599764653  H,0,-0.4385119865,-4.0773349498,1.4801234863  H,0,-1.9862172062,-3.5405183286,0.8307082461  H,0,-1.1768180583,-4.9389601874,0.1325292467  Cl,0,0.7776212981,0.6037254492,3.4116518277 | **3′**, ClGa[C4(SiMe3)4], *C*4, NI = 2, *ω*1 = *i*51, E = -4174.966021  C,0,-0.0003485845,1.0673185951,-0.1042194384  C,0,-1.0673185951,-0.0003485845,-0.1042194384  C,0,1.0673185951,0.0003485845,-0.1042194384  C,0,0.0003485845,-1.0673185951,-0.1042194384  Ga,0,0.,0.,1.6626801663  Si,0,-0.0574425403,-2.9220100613,-0.4147470408  Si,0,2.9220100613,-0.0574425403,-0.4147470408  Si,0,-2.9220100613,0.0574425403,-0.4147470408  Si,0,0.0574425403,2.9220100613,-0.4147470408  C,0,0.6765486541,3.2215347656,-2.1723034333  H,0,-0.0257421688,2.8055572131,-2.8990198018  H,0,0.7657926455,4.2924815002,-2.373646855  H,0,1.6488928996,2.7654183493,-2.3616818095  C,0,1.1424909794,3.8131427263,0.8427786581  H,0,2.1622019891,3.4387728055,0.8931447529  H,0,1.1938154578,4.8775420202,0.5963261003  H,0,0.7057006927,3.729631346,1.841320501  C,0,-1.6218050768,3.7646485029,-0.2777502238  H,0,-2.3851572638,3.3502581158,-0.9347894286  H,0,-2.0047394052,3.7568751187,0.7437229154  H,0,-1.4851496774,4.812849914,-0.5600461628  C,0,-3.2215347656,0.6765486541,-2.1723034333  H,0,-2.8055572131,-0.0257421688,-2.8990198018  H,0,-4.2924815002,0.7657926455,-2.373646855  H,0,-2.7654183493,1.6488928996,-2.3616818095  C,0,-3.8131427263,1.1424909794,0.8427786581  H,0,-3.729631346,0.7057006927,1.841320501  H,0,-3.4387728055,2.1622019891,0.8931447529  H,0,-4.8775420202,1.1938154578,0.5963261003  C,0,-3.7646485029,-1.6218050768,-0.2777502238  H,0,-3.3502581158,-2.3851572638,-0.9347894286  H,0,-3.7568751187,-2.0047394052,0.7437229154  H,0,-4.812849914,-1.4851496774,-0.5600461628  C,0,3.2215347656,-0.6765486541,-2.1723034333  H,0,2.8055572131,0.0257421688,-2.8990198018  H,0,4.2924815002,-0.7657926455,-2.373646855  H,0,2.7654183493,-1.6488928996,-2.3616818095  C,0,3.7646485029,1.6218050768,-0.2777502238  H,0,3.3502581158,2.3851572638,-0.9347894286  H,0,3.7568751187,2.0047394052,0.7437229154  H,0,4.812849914,1.4851496774,-0.5600461628  C,0,3.8131427263,-1.1424909794,0.8427786581  H,0,3.729631346,-0.7057006927,1.841320501  H,0,3.4387728055,-2.1622019891,0.8931447529  H,0,4.8775420202,-1.1938154578,0.5963261003  C,0,-0.6765486541,-3.2215347656,-2.1723034333  H,0,0.0257421688,-2.8055572131,-2.8990198018  H,0,-0.7657926455,-4.2924815002,-2.373646855  H,0,-1.6488928996,-2.7654183493,-2.3616818095  C,0,1.6218050768,-3.7646485029,-0.2777502238  H,0,2.3851572638,-3.3502581158,-0.9347894286  H,0,2.0047394052,-3.7568751187,0.7437229154  H,0,1.4851496774,-4.812849914,-0.5600461628  C,0,-1.1424909794,-3.8131427263,0.8427786581  H,0,-0.7057006927,-3.729631346,1.841320501  H,0,-2.1622019891,-3.4387728055,0.8931447529  H,0,-1.1938154578,-4.8775420202,0.5963261003  Cl,0,0.,0.,3.7855569134 |
| **4′**, ClB[Si4(SiMe*t*Bu2)4], *C*4, NI = 0, *ω*1 = 17, E = -4224.333199  Si,0,-1.6090182207,0.0909546249,-0.5002818276  Si,0,-0.0909546249,-1.6090182207,-0.5002818276  Si,0,1.6090182207,-0.0909546249,-0.5002818276  Si,0,0.0909546249,1.6090182207,-0.5002818276  Si,0,-3.9903898685,0.1437925819,-0.1221175366  Si,0,0.1437925819,3.9903898685,-0.1221175366  Si,0,3.9903898685,-0.1437925819,-0.1221175366  Si,0,-0.1437925819,-3.9903898685,-0.1221175366  B,0,0.,0.,0.919865005  C,0,-4.6103739898,-1.6398444222,-0.2017710367  C,0,-4.7728862669,1.0430618812,-1.663052067  C,0,-4.4565773906,0.8458061722,1.6266546455  C,0,0.8458061722,4.4565773906,1.6266546455  C,0,1.0430618812,4.7728862669,-1.663052067  C,0,-1.6398444222,4.6103739898,-0.2017710367  C,0,4.6103739898,1.6398444222,-0.2017710367  C,0,4.7728862669,-1.0430618812,-1.663052067  C,0,4.4565773906,-0.8458061722,1.6266546455  C,0,-0.8458061722,-4.4565773906,1.6266546455  C,0,-1.0430618812,-4.7728862669,-1.663052067  C,0,1.6398444222,-4.6103739898,-0.2017710367  H,0,-1.6742235604,5.6677682533,0.0723873646  H,0,5.6677682533,1.6742235604,0.0723873646  H,0,1.6742235604,-5.6677682533,0.0723873646  H,0,-5.6677682533,-1.6742235604,0.0723873646  H,0,-2.2950073286,4.0716940396,0.4780650397  H,0,4.0716940396,2.2950073286,0.4780650397  H,0,2.2950073286,-4.0716940396,0.4780650397  H,0,-4.0716940396,-2.2950073286,0.4780650397  H,0,-2.04848191,4.5184323316,-1.2081253226  H,0,4.5184323316,2.04848191,-1.2081253226  H,0,2.04848191,-4.5184323316,-1.2081253226  H,0,-4.5184323316,-2.04848191,-1.2081253226  C,0,-3.7573315593,2.1768029286,1.9343731894  H,0,-2.6718873037,2.0779694423,1.8992292816  H,0,-4.055712253,2.9667723498,1.244585534  H,0,-4.0196893665,2.5100115575,2.9446625324  C,0,-5.9789076747,1.0485947312,1.7555219821  H,0,-6.5430967931,0.1401503307,1.5338612715  H,0,-6.2216939124,1.3350408397,2.7849991294  H,0,-6.3489152971,1.8436210286,1.1060451294  C,0,-4.0139989688,-0.1812858089,2.6871432972  H,0,-4.2468470336,0.2039999883,3.6858642176  H,0,-4.5303789675,-1.1367259134,2.5798847149  H,0,-2.9389328339,-0.3657364201,2.65624924  C,0,-6.2712283402,0.6929061944,-1.7776456057  H,0,-6.8481504542,1.0261763527,-0.9149060032  H,0,-6.6931122713,1.1850583714,-2.6609688875  H,0,-6.4350653946,-0.3793122011,-1.8961081433  C,0,-4.0771021951,0.5495503354,-2.9464743218  H,0,-3.02321776,0.8313913547,-2.9768560679  H,0,-4.1340755384,-0.535116023,-3.0610532038  H,0,-4.563516471,0.9942549982,-3.8219927648  C,0,-4.6252752293,2.5697512748,-1.5942533961  H,0,-5.1586233135,2.9997930442,-0.7450230488  H,0,-3.5801865664,2.871793908,-1.5227955087  H,0,-5.036449736,3.0271172259,-2.501412972  C,0,0.1812858089,-4.0139989688,2.6871432972  H,0,-0.2039999883,-4.2468470336,3.6858642176  H,0,1.1367259134,-4.5303789675,2.5798847149  H,0,0.3657364201,-2.9389328339,2.65624924  C,0,-1.0485947312,-5.9789076747,1.7555219821  H,0,-1.3350408397,-6.2216939124,2.7849991294  H,0,-1.8436210286,-6.3489152971,1.1060451294  H,0,-0.1401503307,-6.5430967931,1.5338612715  C,0,-2.1768029286,-3.7573315593,1.9343731894  H,0,-2.0779694423,-2.6718873037,1.8992292816  H,0,-2.9667723498,-4.055712253,1.244585534  H,0,-2.5100115575,-4.0196893665,2.9446625324  C,0,-2.5697512748,-4.6252752293,-1.5942533961  H,0,-2.9997930442,-5.1586233135,-0.7450230488  H,0,-2.871793908,-3.5801865664,-1.5227955087  H,0,-3.0271172259,-5.036449736,-2.501412972  C,0,-0.6929061944,-6.2712283402,-1.7776456057  H,0,-1.0261763527,-6.8481504542,-0.9149060032  H,0,-1.1850583714,-6.6931122713,-2.6609688875  H,0,0.3793122011,-6.4350653946,-1.8961081433  C,0,-0.5495503354,-4.0771021951,-2.9464743218  H,0,0.535116023,-4.1340755384,-3.0610532038  H,0,-0.9942549982,-4.563516471,-3.8219927648  H,0,-0.8313913547,-3.02321776,-2.9768560679  C,0,3.7573315593,-2.1768029286,1.9343731894  H,0,2.6718873037,-2.0779694423,1.8992292816  H,0,4.055712253,-2.9667723498,1.244585534  H,0,4.0196893665,-2.5100115575,2.9446625324  C,0,4.0139989688,0.1812858089,2.6871432972  H,0,4.2468470336,-0.2039999883,3.6858642176  H,0,4.5303789675,1.1367259134,2.5798847149  H,0,2.9389328339,0.3657364201,2.65624924  C,0,5.9789076747,-1.0485947312,1.7555219821  H,0,6.2216939124,-1.3350408397,2.7849991294  H,0,6.3489152971,-1.8436210286,1.1060451294  H,0,6.5430967931,-0.1401503307,1.5338612715  C,0,4.6252752293,-2.5697512748,-1.5942533961  H,0,5.1586233135,-2.9997930442,-0.7450230488  H,0,3.5801865664,-2.871793908,-1.5227955087  H,0,5.036449736,-3.0271172259,-2.501412972  C,0,6.2712283402,-0.6929061944,-1.7776456057  H,0,6.8481504542,-1.0261763527,-0.9149060032  H,0,6.6931122713,-1.1850583714,-2.6609688875  H,0,6.4350653946,0.3793122011,-1.8961081433  C,0,4.0771021951,-0.5495503354,-2.9464743218  H,0,4.1340755384,0.535116023,-3.0610532038  H,0,4.563516471,-0.9942549982,-3.8219927648  H,0,3.02321776,-0.8313913547,-2.9768560679  C,0,2.1768029286,3.7573315593,1.9343731894  H,0,2.0779694423,2.6718873037,1.8992292816  H,0,2.9667723498,4.055712253,1.244585534  H,0,2.5100115575,4.0196893665,2.9446625324  C,0,-0.1812858089,4.0139989688,2.6871432972  H,0,0.2039999883,4.2468470336,3.6858642176  H,0,-1.1367259134,4.5303789675,2.5798847149  H,0,-0.3657364201,2.9389328339,2.65624924  C,0,1.0485947312,5.9789076747,1.7555219821  H,0,1.3350408397,6.2216939124,2.7849991294  H,0,1.8436210286,6.3489152971,1.1060451294  H,0,0.1401503307,6.5430967931,1.5338612715  C,0,0.6929061944,6.2712283402,-1.7776456057  H,0,1.0261763527,6.8481504542,-0.9149060032  H,0,1.1850583714,6.6931122713,-2.6609688875  H,0,-0.3793122011,6.4350653946,-1.8961081433  C,0,2.5697512748,4.6252752293,-1.5942533961  H,0,2.9997930442,5.1586233135,-0.7450230488  H,0,2.871793908,3.5801865664,-1.5227955087  H,0,3.0271172259,5.036449736,-2.501412972  C,0,0.5495503354,4.0771021951,-2.9464743218  H,0,0.8313913547,3.02321776,-2.9768560679  H,0,-0.535116023,4.1340755384,-3.0610532038  H,0,0.9942549982,4.563516471,-3.8219927648  Cl,0,0.,0.,2.7434916659 | |
| **5′**, ClAl[Si4(SiMe*t*Bu2)4], *C*4, NI = 0, *ω*1 = 18, E = -4441.990734  Si,0,-1.5481128154,0.5500407997,0.3798548277  Si,0,0.5500407997,1.5481128154,0.3798548277  Si,0,1.5481128154,-0.5500407997,0.3798548277  Si,0,-0.5500407997,-1.5481128154,0.3798548277  Si,0,-3.7818015347,1.4221137634,0.2469912921  Si,0,-1.4221137634,-3.7818015347,0.2469912921  Si,0,3.7818015347,-1.4221137634,0.2469912921  Si,0,1.4221137634,3.7818015347,0.2469912921  Al,0,0.,0.,-1.5276134092  C,0,-3.6620324836,3.3089333393,0.259851028  C,0,-4.6887936648,0.9241863869,1.8975341353  C,0,-4.6501134276,0.9191580542,-1.4193196982  C,0,-0.9191580542,-4.6501134276,-1.4193196982  C,0,-0.9241863869,-4.6887936648,1.8975341353  C,0,-3.3089333393,-3.6620324836,0.259851028  C,0,3.6620324836,-3.3089333393,0.259851028  C,0,4.6887936648,-0.9241863869,1.8975341353  C,0,4.6501134276,-0.9191580542,-1.4193196982  C,0,0.9191580542,4.6501134276,-1.4193196982  C,0,0.9241863869,4.6887936648,1.8975341353  C,0,3.3089333393,3.6620324836,0.259851028  H,0,-3.742703539,-4.6406301323,0.0390771647  H,0,4.6406301323,-3.742703539,0.0390771647  H,0,3.742703539,4.6406301323,0.0390771647  H,0,-4.6406301323,3.742703539,0.0390771647  H,0,-3.6799345077,-2.9613250603,-0.484321538  H,0,2.9613250603,-3.6799345077,-0.484321538  H,0,3.6799345077,2.9613250603,-0.484321538  H,0,-2.9613250603,3.6799345077,-0.484321538  H,0,-3.6836820375,-3.3480286919,1.2335896913  H,0,3.3480286919,-3.6836820375,1.2335896913  H,0,3.6836820375,3.3480286919,1.2335896913  H,0,-3.3480286919,3.6836820375,1.2335896913  C,0,-4.5461543731,-0.5828777226,-1.7175449249  H,0,-3.5072083506,-0.9093988868,-1.7820154857  H,0,-5.0490968594,-1.1881719958,-0.9628602874  H,0,-5.017238729,-0.8048549568,-2.6815341909  C,0,-6.1403433134,1.3112922638,-1.4064420729  H,0,-6.2962678611,2.3670991241,-1.1747467743  H,0,-6.5733367321,1.1311371052,-2.3966462432  H,0,-6.7143420926,0.7201868111,-0.6917228785  C,0,-3.9611539833,1.6850185764,-2.5661588852  H,0,-4.4083480853,1.3920341134,-3.522108559  H,0,-4.077010955,2.7658456111,-2.4704771271  H,0,-2.8941208902,1.4628832263,-2.6273427032  C,0,-5.9619812319,1.7722173431,2.0931789448  H,0,-6.7091234435,1.5943367947,1.3201079485  H,0,-6.4234186119,1.5209544228,3.0546809687  H,0,-5.743942824,2.8414640235,2.1095597892  C,0,-3.7514106468,1.2082892753,3.0877957235  H,0,-2.8526660069,0.589694396,3.0606621663  H,0,-3.4358672147,2.2530838789,3.129326424  H,0,-4.2741767458,0.9907705189,4.0259784445  C,0,-5.0682637741,-0.5633900755,1.9317402634  H,0,-5.7967983328,-0.8247358067,1.1624430093  H,0,-4.1950362979,-1.2041158547,1.80079346  H,0,-5.5157046246,-0.8146597198,2.9002500291  C,0,1.6850185764,3.9611539833,-2.5661588852  H,0,1.3920341134,4.4083480853,-3.522108559  H,0,2.7658456111,4.077010955,-2.4704771271  H,0,1.4628832263,2.8941208902,-2.6273427032  C,0,1.3112922638,6.1403433134,-1.4064420729  H,0,1.1311371052,6.5733367321,-2.3966462432  H,0,0.7201868111,6.7143420926,-0.6917228785  H,0,2.3670991241,6.2962678611,-1.1747467743  C,0,-0.5828777226,4.5461543731,-1.7175449249  H,0,-0.9093988868,3.5072083506,-1.7820154857  H,0,-1.1881719958,5.0490968594,-0.9628602874  H,0,-0.8048549568,5.017238729,-2.6815341909  C,0,-0.5633900755,5.0682637741,1.9317402634  H,0,-0.8247358067,5.7967983328,1.1624430093  H,0,-1.2041158547,4.1950362979,1.80079346  H,0,-0.8146597198,5.5157046246,2.9002500291  C,0,1.7722173431,5.9619812319,2.0931789448  H,0,1.5943367947,6.7091234435,1.3201079485  H,0,1.5209544228,6.4234186119,3.0546809687  H,0,2.8414640235,5.743942824,2.1095597892  C,0,1.2082892753,3.7514106468,3.0877957235  H,0,2.2530838789,3.4358672147,3.129326424  H,0,0.9907705189,4.2741767458,4.0259784445  H,0,0.589694396,2.8526660069,3.0606621663  C,0,4.5461543731,0.5828777226,-1.7175449249  H,0,3.5072083506,0.9093988868,-1.7820154857  H,0,5.0490968594,1.1881719958,-0.9628602874  H,0,5.017238729,0.8048549568,-2.6815341909  C,0,3.9611539833,-1.6850185764,-2.5661588852  H,0,4.4083480853,-1.3920341134,-3.522108559  H,0,4.077010955,-2.7658456111,-2.4704771271  H,0,2.8941208902,-1.4628832263,-2.6273427032  C,0,6.1403433134,-1.3112922638,-1.4064420729  H,0,6.5733367321,-1.1311371052,-2.3966462432  H,0,6.7143420926,-0.7201868111,-0.6917228785  H,0,6.2962678611,-2.3670991241,-1.1747467743  C,0,5.0682637741,0.5633900755,1.9317402634  H,0,5.7967983328,0.8247358067,1.1624430093  H,0,4.1950362979,1.2041158547,1.80079346  H,0,5.5157046246,0.8146597198,2.9002500291  C,0,5.9619812319,-1.7722173431,2.0931789448  H,0,6.7091234435,-1.5943367947,1.3201079485  H,0,6.4234186119,-1.5209544228,3.0546809687  H,0,5.743942824,-2.8414640235,2.1095597892  C,0,3.7514106468,-1.2082892753,3.0877957235  H,0,3.4358672147,-2.2530838789,3.129326424  H,0,4.2741767458,-0.9907705189,4.0259784445  H,0,2.8526660069,-0.589694396,3.0606621663  C,0,0.5828777226,-4.5461543731,-1.7175449249  H,0,0.9093988868,-3.5072083506,-1.7820154857  H,0,1.1881719958,-5.0490968594,-0.9628602874  H,0,0.8048549568,-5.017238729,-2.6815341909  C,0,-1.6850185764,-3.9611539833,-2.5661588852  H,0,-1.3920341134,-4.4083480853,-3.522108559  H,0,-2.7658456111,-4.077010955,-2.4704771271  H,0,-1.4628832263,-2.8941208902,-2.6273427032  C,0,-1.3112922638,-6.1403433134,-1.4064420729  H,0,-1.1311371052,-6.5733367321,-2.3966462432  H,0,-0.7201868111,-6.7143420926,-0.6917228785  H,0,-2.3670991241,-6.2962678611,-1.1747467743  C,0,-1.7722173431,-5.9619812319,2.0931789448  H,0,-1.5943367947,-6.7091234435,1.3201079485  H,0,-1.5209544228,-6.4234186119,3.0546809687  H,0,-2.8414640235,-5.743942824,2.1095597892  C,0,0.5633900755,-5.0682637741,1.9317402634  H,0,0.8247358067,-5.7967983328,1.1624430093  H,0,1.2041158547,-4.1950362979,1.80079346  H,0,0.8146597198,-5.5157046246,2.9002500291  C,0,-1.2082892753,-3.7514106468,3.0877957235  H,0,-0.589694396,-2.8526660069,3.0606621663  H,0,-2.2530838789,-3.4358672147,3.129326424  H,0,-0.9907705189,-4.2741767458,4.0259784445  Cl,0,0.,0.,-3.6593074407 | |
| **6′**, ClGa[Si4(SiMe*t*Bu2)4], *C*4, NI = 0, *ω*1 = 18, E = -6124.421222  Si,0,-1.253495469,-1.0697671399,-0.5314360854  Si,0,1.0697671399,-1.253495469,-0.5314360854  Si,0,1.253495469,1.0697671399,-0.5314360854  Si,0,-1.0697671399,1.253495469,-0.5314360854  Si,0,-3.0090788441,-2.7003166939,-0.3607975228  Si,0,-2.7003166939,3.0090788441,-0.3607975228  Si,0,3.0090788441,2.7003166939,-0.3607975228  Si,0,2.7003166939,-3.0090788441,-0.3607975228  Ga,0,0.,0.,1.3692278654  C,0,-2.1850399354,-4.4010200144,-0.4080540491  C,0,-4.0910471708,-2.5777624339,-1.9766304765  C,0,-3.9577430109,-2.5631552203,1.3301812398  C,0,-2.5631552203,3.9577430109,1.3301812398  C,0,-2.5777624339,4.0910471708,-1.9766304765  C,0,-4.4010200144,2.1850399354,-0.4080540491  C,0,2.1850399354,4.4010200144,-0.4080540491  C,0,4.0910471708,2.5777624339,-1.9766304765  C,0,3.9577430109,2.5631552203,1.3301812398  C,0,2.5631552203,-3.9577430109,1.3301812398  C,0,2.5777624339,-4.0910471708,-1.9766304765  C,0,4.4010200144,-2.1850399354,-0.4080540491  H,0,-5.1751824184,2.9207618679,-0.1763577676  H,0,2.9207618679,5.1751824184,-0.1763577676  H,0,5.1751824184,-2.9207618679,-0.1763577676  H,0,-2.9207618679,-5.1751824184,-0.1763577676  H,0,-4.4858456588,1.3772879401,0.315144517  H,0,1.3772879401,4.4858456588,0.315144517  H,0,4.4858456588,-1.3772879401,0.315144517  H,0,-1.3772879401,-4.4858456588,0.315144517  H,0,-4.6191504904,1.7781551579,-1.3953214821  H,0,1.7781551579,4.6191504904,-1.3953214821  H,0,4.6191504904,-1.7781551579,-1.3953214821  H,0,-1.7781551579,-4.6191504904,-1.3953214821  C,0,-3.0164533179,3.0065664116,2.4552627796  H,0,-2.9242509126,3.5138943791,3.4215376957  H,0,-4.05906245,2.7031879148,2.3457767712  H,0,-2.4036465343,2.1048559082,2.5055940287  C,0,-3.4868422996,5.1914147395,1.3421930616  H,0,-3.4746179892,5.645889244,2.3390353774  H,0,-3.1626953634,5.9565704812,0.6354800568  H,0,-4.5256603828,4.9406031305,1.1166847694  C,0,-1.1312635262,4.4171024104,1.6397147106  H,0,-1.1021323318,4.9113613708,2.6170104633  H,0,-0.4390423716,3.5750642786,1.6825529928  H,0,-0.7589626962,5.129971476,0.9034227998  C,0,-1.3904401608,5.0644538839,-1.945595753  H,0,-1.4868033571,5.810205891,-1.155119382  H,0,-0.4429519546,4.5439541966,-1.8015013431  H,0,-1.3244995941,5.6061602117,-2.8960783904  C,0,-2.4091282824,3.1634887088,-3.1956678529  H,0,-3.2199787626,2.4368218955,-3.281616376  H,0,-2.4111100938,3.7607606707,-4.114421092  H,0,-1.4687677531,2.6102289631,-3.164988966  C,0,-3.8782744161,4.896267089,-2.1790331122  H,0,-4.0620705953,5.609176967,-1.3752157662  H,0,-3.8116097402,5.4680002868,-3.1113203377  H,0,-4.7531713516,4.2490548088,-2.2592223388  C,0,-5.0644538839,-1.3904401608,-1.945595753  H,0,-5.810205891,-1.4868033571,-1.155119382  H,0,-4.5439541966,-0.4429519546,-1.8015013431  H,0,-5.6061602117,-1.3244995941,-2.8960783904  C,0,-3.1634887088,-2.4091282824,-3.1956678529  H,0,-2.4368218955,-3.2199787626,-3.281616376  H,0,-3.7607606707,-2.4111100938,-4.114421092  H,0,-2.6102289631,-1.4687677531,-3.164988966  C,0,-4.896267089,-3.8782744161,-2.1790331122  H,0,-5.4680002868,-3.8116097402,-3.1113203377  H,0,-4.2490548088,-4.7531713516,-2.2592223388  H,0,-5.609176967,-4.0620705953,-1.3752157662  C,0,-5.1914147395,-3.4868422996,1.3421930616  H,0,-5.645889244,-3.4746179892,2.3390353774  H,0,-5.9565704812,-3.1626953634,0.6354800568  H,0,-4.9406031305,-4.5256603828,1.1166847694  C,0,-3.0065664116,-3.0164533179,2.4552627796  H,0,-3.5138943791,-2.9242509126,3.4215376957  H,0,-2.7031879148,-4.05906245,2.3457767712  H,0,-2.1048559082,-2.4036465343,2.5055940287  C,0,-4.4171024104,-1.1312635262,1.6397147106  H,0,-4.9113613708,-1.1021323318,2.6170104633  H,0,-3.5750642786,-0.4390423716,1.6825529928  H,0,-5.129971476,-0.7589626962,0.9034227998  C,0,1.1312635262,-4.4171024104,1.6397147106  H,0,1.1021323318,-4.9113613708,2.6170104633  H,0,0.4390423716,-3.5750642786,1.6825529928  H,0,0.7589626962,-5.129971476,0.9034227998  C,0,3.0164533179,-3.0065664116,2.4552627796  H,0,2.9242509126,-3.5138943791,3.4215376957  H,0,4.05906245,-2.7031879148,2.3457767712  H,0,2.4036465343,-2.1048559082,2.5055940287  C,0,3.4868422996,-5.1914147395,1.3421930616  H,0,3.4746179892,-5.645889244,2.3390353774  H,0,3.1626953634,-5.9565704812,0.6354800568  H,0,4.5256603828,-4.9406031305,1.1166847694  C,0,2.4091282824,-3.1634887088,-3.1956678529  H,0,2.4111100938,-3.7607606707,-4.114421092  H,0,1.4687677531,-2.6102289631,-3.164988966  H,0,3.2199787626,-2.4368218955,-3.281616376  C,0,3.8782744161,-4.896267089,-2.1790331122  H,0,4.0620705953,-5.609176967,-1.3752157662  H,0,3.8116097402,-5.4680002868,-3.1113203377  H,0,4.7531713516,-4.2490548088,-2.2592223388  C,0,1.3904401608,-5.0644538839,-1.945595753  H,0,1.4868033571,-5.810205891,-1.155119382  H,0,0.4429519546,-4.5439541966,-1.8015013431  H,0,1.3244995941,-5.6061602117,-2.8960783904  C,0,3.1634887088,2.4091282824,-3.1956678529  H,0,2.6102289631,1.4687677531,-3.164988966  H,0,2.4368218955,3.2199787626,-3.281616376  H,0,3.7607606707,2.4111100938,-4.114421092  C,0,4.896267089,3.8782744161,-2.1790331122  H,0,5.4680002868,3.8116097402,-3.1113203377  H,0,4.2490548088,4.7531713516,-2.2592223388  H,0,5.609176967,4.0620705953,-1.3752157662  C,0,5.0644538839,1.3904401608,-1.945595753  H,0,5.810205891,1.4868033571,-1.155119382  H,0,4.5439541966,0.4429519546,-1.8015013431  H,0,5.6061602117,1.3244995941,-2.8960783904  C,0,5.1914147395,3.4868422996,1.3421930616  H,0,5.645889244,3.4746179892,2.3390353774  H,0,5.9565704812,3.1626953634,0.6354800568  H,0,4.9406031305,4.5256603828,1.1166847694  C,0,3.0065664116,3.0164533179,2.4552627796  H,0,3.5138943791,2.9242509126,3.4215376957  H,0,2.7031879148,4.05906245,2.3457767712  H,0,2.1048559082,2.4036465343,2.5055940287  C,0,4.4171024104,1.1312635262,1.6397147106  H,0,4.9113613708,1.1021323318,2.6170104633  H,0,3.5750642786,0.4390423716,1.6825529928  H,0,5.129971476,0.7589626962,0.9034227998  Cl,0,0.,0.,3.5560075539 | |
| **7′**, ClB[Ge4(SiMe*t*Bu2)4], *C*2, NI = 0, *ω*1 = 18, E = -11374.529115  Ge,0,0.0197414897,1.6403707563,-0.2138043344  Ge,0,-1.7422032298,0.021234692,-0.7751486022  Ge,0,-0.0197414897,-1.6403707563,-0.2138043344  Ge,0,1.7422032298,-0.021234692,-0.7751486022  Si,0,-0.0488363598,4.0832948961,-0.0266260998  Si,0,4.1242701418,0.036856861,-0.0521792811  Si,0,0.0488363598,-4.0832948961,-0.0266260998  Si,0,-4.1242701418,-0.036856861,-0.0521792811  B,0,0.,0.,1.0713529907  C,0,-1.8668449709,4.5957545965,-0.0446057553  C,0,0.7540788294,4.8007502831,-1.6428355257  C,0,0.7092331134,4.6276071353,1.6711676406  C,0,4.461705025,-0.5508298034,1.7700910146  C,0,5.0797230825,-0.9150981213,-1.4626895805  C,0,4.6742176781,1.844991159,-0.180059859  C,0,1.8668449709,-4.5957545965,-0.0446057553  C,0,-0.7540788294,-4.8007502831,-1.6428355257  C,0,-0.7092331134,-4.6276071353,1.6711676406  C,0,-4.461705025,0.5508298034,1.7700910146  C,0,-5.0797230825,0.9150981213,-1.4626895805  C,0,-4.6742176781,-1.844991159,-0.180059859  H,0,5.7010569088,1.956120312,0.1782997237  H,0,1.9580595217,-5.66175227,0.1799341132  H,0,-5.7010569088,-1.956120312,0.1782997237  H,0,-1.9580595217,5.66175227,0.1799341132  H,0,4.0444459902,2.5037845661,0.4143891229  H,0,2.4536837005,-4.0505411162,0.6916059651  H,0,-4.0444459902,-2.5037845661,0.4143891229  H,0,-2.4536837005,4.0505411162,0.6916059651  H,0,4.6455199979,2.1980457386,-1.2117115162  H,0,2.317276694,-4.4260126683,-1.0224977979  H,0,-4.6455199979,-2.1980457386,-1.2117115162  H,0,-2.317276694,4.4260126683,-1.0224977979  C,0,2.1040581031,4.0327671752,1.9142316267  H,0,2.085915194,2.9425621001,1.8972024862  H,0,2.8335378276,4.3736895264,1.179031164  H,0,2.4696451878,4.3354712787,2.9016358128  C,0,0.8054933317,6.1631202761,1.7668515373  H,0,-0.1493662949,6.6573932568,1.5756443729  H,0,1.1186515083,6.4456117289,2.7780680322  H,0,1.542875944,6.5745054904,1.0758457104  C,0,-0.2242494447,4.1277333838,2.792238765  H,0,0.2021705997,4.3945356823,3.7653268635  H,0,-1.2163513892,4.5791115485,2.7389932632  H,0,-0.3412464853,3.042391404,2.7783593081  C,0,0.4094886594,6.2970545904,-1.7870430343  H,0,0.8190279606,6.9017758544,-0.9779005527  H,0,0.8302127294,6.6790433532,-2.7237275683  H,0,-0.6674829956,6.4691599339,-1.8236482823  C,0,0.16794097,4.0625094214,-2.8630626945  H,0,0.413066587,2.9993238303,-2.8598614002  H,0,-0.9187074434,4.1540756485,-2.9208012598  H,0,0.5784751791,4.4943028826,-3.7824990135  C,0,2.2814948407,4.6379559758,-1.668565497  H,0,2.7719225087,5.2105603907,-0.8797439463  H,0,2.5830940162,3.5946590901,-1.5648715172  H,0,2.6779400116,4.9986508432,-2.6243241305  C,0,-3.9004498458,-0.5209532787,2.7232516124  H,0,-4.0457456526,-0.1998431462,3.7605260281  H,0,-4.4060161538,-1.4805798489,2.6058084181  H,0,-2.8303420642,-0.6747677202,2.5804870762  C,0,-5.9723888275,0.6906381179,2.041561208  H,0,-6.132802512,0.8963206468,3.1060574849  H,0,-6.4171516481,1.5162659721,1.4847497409  H,0,-6.5289190993,-0.2183096027,1.8024509336  C,0,-3.7803140404,1.8867668612,2.1000826862  H,0,-2.6994583885,1.8295971754,1.9669118881  H,0,-4.1601873293,2.7057241186,1.4880744134  H,0,-3.9664512063,2.1493518097,3.1475243952  C,0,-4.9173996359,2.4385761994,-1.3528842964  H,0,-5.3655784482,2.8391657006,-0.4422469676  H,0,-3.8677493439,2.7358489598,-1.3689595414  H,0,-5.409649415,2.9309041922,-2.1995027882  C,0,-6.5824920166,0.5704908564,-1.4339905987  H,0,-7.0693163528,0.8871662745,-0.5120813503  H,0,-7.0895827307,1.0808954696,-2.260733439  H,0,-6.7607569725,-0.4990036773,-1.5578756758  C,0,-4.5304008831,0.4721331348,-2.8336826289  H,0,-4.5986027973,-0.6080136021,-2.9803707824  H,0,-5.1127740449,0.9446823908,-3.6327859925  H,0,-3.4873727266,0.7617356774,-2.9756674063  C,0,-2.1040581031,-4.0327671752,1.9142316267  H,0,-2.085915194,-2.9425621001,1.8972024862  H,0,-2.8335378276,-4.3736895264,1.179031164  H,0,-2.4696451878,-4.3354712787,2.9016358128  C,0,0.2242494447,-4.1277333838,2.792238765  H,0,-0.2021705997,-4.3945356823,3.7653268635  H,0,1.2163513892,-4.5791115485,2.7389932632  H,0,0.3412464853,-3.042391404,2.7783593081  C,0,-0.8054933317,-6.1631202761,1.7668515373  H,0,-1.1186515083,-6.4456117289,2.7780680322  H,0,-1.542875944,-6.5745054904,1.0758457104  H,0,0.1493662949,-6.6573932568,1.5756443729  C,0,-2.2814948407,-4.6379559758,-1.668565497  H,0,-2.7719225087,-5.2105603907,-0.8797439463  H,0,-2.5830940162,-3.5946590901,-1.5648715172  H,0,-2.6779400116,-4.9986508432,-2.6243241305  C,0,-0.4094886594,-6.2970545904,-1.7870430343  H,0,-0.8190279606,-6.9017758544,-0.9779005527  H,0,-0.8302127294,-6.6790433532,-2.7237275683  H,0,0.6674829956,-6.4691599339,-1.8236482823  C,0,-0.16794097,-4.0625094214,-2.8630626945  H,0,0.9187074434,-4.1540756485,-2.9208012598  H,0,-0.5784751791,-4.4943028826,-3.7824990135  H,0,-0.413066587,-2.9993238303,-2.8598614002  C,0,3.7803140404,-1.8867668612,2.1000826862  H,0,2.6994583885,-1.8295971754,1.9669118881  H,0,4.1601873293,-2.7057241186,1.4880744134  H,0,3.9664512063,-2.1493518097,3.1475243952  C,0,3.9004498458,0.5209532787,2.7232516124  H,0,4.0457456526,0.1998431462,3.7605260281  H,0,4.4060161538,1.4805798489,2.6058084181  H,0,2.8303420642,0.6747677202,2.5804870762  C,0,5.9723888275,-0.6906381179,2.041561208  H,0,6.132802512,-0.8963206468,3.1060574849  H,0,6.4171516481,-1.5162659721,1.4847497409  H,0,6.5289190993,0.2183096027,1.8024509336  C,0,6.5824920166,-0.5704908564,-1.4339905987  H,0,7.0693163528,-0.8871662745,-0.5120813503  H,0,7.0895827307,-1.0808954696,-2.260733439  H,0,6.7607569725,0.4990036773,-1.5578756758  C,0,4.9173996359,-2.4385761994,-1.3528842964  H,0,5.3655784482,-2.8391657006,-0.4422469676  H,0,3.8677493439,-2.7358489598,-1.3689595414  H,0,5.409649415,-2.9309041922,-2.1995027882  C,0,4.5304008831,-0.4721331348,-2.8336826289  H,0,3.4873727266,-0.7617356774,-2.9756674063  H,0,4.5986027973,0.6080136021,-2.9803707824  H,0,5.1127740449,-0.9446823908,-3.6327859925  Cl,0,0.,0.,2.8769076617 | **7′**, ClB[Ge4(SiMe*t*Bu2)4], *C*4, NI = 1, *ω*1 = *i*64, E = -11374.524889  Ge,0,-1.5483480013,0.7114329691,-0.7060893569  Ge,0,-0.7114329691,-1.5483480013,-0.7060893569  Ge,0,1.5483480013,-0.7114329691,-0.7060893569  Ge,0,0.7114329691,1.5483480013,-0.7060893569  Si,0,-3.8034829543,1.545274753,-0.1966299057  Si,0,1.545274753,3.8034829543,-0.1966299057  Si,0,3.8034829543,-1.545274753,-0.1966299057  Si,0,-1.545274753,-3.8034829543,-0.1966299057  B,0,0.,0.,0.7573155656  C,0,-4.9270799952,0.0314010283,-0.3254048982  C,0,-4.2979222456,2.728198032,-1.6610767072  C,0,-3.9513344467,2.2669287731,1.5969941884  C,0,2.2669287731,3.9513344467,1.5969941884  C,0,2.728198032,4.2979222456,-1.6610767072  C,0,0.0314010283,4.9270799952,-0.3254048982  C,0,4.9270799952,-0.0314010283,-0.3254048982  C,0,4.2979222456,-2.728198032,-1.6610767072  C,0,3.9513344467,-2.2669287731,1.5969941884  C,0,-2.2669287731,-3.9513344467,1.5969941884  C,0,-2.728198032,-4.2979222456,-1.6610767072  C,0,-0.0314010283,-4.9270799952,-0.3254048982  H,0,0.2854355761,5.9457763589,-0.0214167639  H,0,5.9457763589,-0.2854355761,-0.0214167639  H,0,-0.2854355761,-5.9457763589,-0.0214167639  H,0,-5.9457763589,0.2854355761,-0.0214167639  H,0,-0.7825882141,4.5848048273,0.3105104119  H,0,4.5848048273,0.7825882141,0.3105104119  H,0,0.7825882141,-4.5848048273,0.3105104119  H,0,-4.5848048273,-0.7825882141,0.3105104119  H,0,-0.3388513636,4.9725065604,-1.3501971368  H,0,4.9725065604,0.3388513636,-1.3501971368  H,0,0.3388513636,-4.9725065604,-1.3501971368  H,0,-4.9725065604,-0.3388513636,-1.3501971368  C,0,-2.8451058254,3.2838515368,1.9142975552  H,0,-1.8542966081,2.8380231384,1.8224773504  H,0,-2.8903780662,4.1615586361,1.2684101471  H,0,-2.9489891609,3.6343603725,2.9472155689  C,0,-5.3206931657,2.942586814,1.8068691918  H,0,-6.1568008937,2.2750954076,1.5867611843  H,0,-5.4182711075,3.2465372876,2.8550925488  H,0,-5.4363541377,3.8410938033,1.199485831  C,0,-3.829367999,1.1004989088,2.5959508004  H,0,-3.8973775938,1.4888433694,3.6180132206  H,0,-4.6279908548,0.3671816984,2.4731227468  H,0,-2.8714638463,0.5858327602,2.510143741  C,0,-5.8330074988,2.8784674863,-1.7192031499  H,0,-6.249345825,3.3259921484,-0.8165306417  H,0,-6.1021849426,3.5291389449,-2.5586740165  H,0,-6.3326468862,1.921795478,-1.8799949429  C,0,-3.8382162191,2.1102311683,-2.9959744515  H,0,-2.7510370278,2.0529233714,-3.0693661156  H,0,-4.233879003,1.1036323654,-3.1483672337  H,0,-4.1956560233,2.7286081983,-3.8269745636  C,0,-3.6672991575,4.1230554732,-1.5344129929  H,0,-4.0227562438,4.6597382047,-0.6534469505  H,0,-2.5790169275,4.0745068293,-1.4825878795  H,0,-3.9254062244,4.7301952535,-2.4094072461  C,0,-1.1004989088,-3.829367999,2.5959508004  H,0,-1.4888433694,-3.8973775938,3.6180132206  H,0,-0.3671816984,-4.6279908548,2.4731227468  H,0,-0.5858327602,-2.8714638463,2.510143741  C,0,-2.942586814,-5.3206931657,1.8068691918  H,0,-3.2465372876,-5.4182711075,2.8550925488  H,0,-3.8410938033,-5.4363541377,1.199485831  H,0,-2.2750954076,-6.1568008937,1.5867611843  C,0,-3.2838515368,-2.8451058254,1.9142975552  H,0,-2.8380231384,-1.8542966081,1.8224773504  H,0,-4.1615586361,-2.8903780662,1.2684101471  H,0,-3.6343603725,-2.9489891609,2.9472155689  C,0,-4.1230554732,-3.6672991575,-1.5344129929  H,0,-4.6597382047,-4.0227562438,-0.6534469505  H,0,-4.0745068293,-2.5790169275,-1.4825878795  H,0,-4.7301952535,-3.9254062244,-2.4094072461  C,0,-2.8784674863,-5.8330074988,-1.7192031499  H,0,-3.3259921484,-6.249345825,-0.8165306417  H,0,-3.5291389449,-6.1021849426,-2.5586740165  H,0,-1.921795478,-6.3326468862,-1.8799949429  C,0,-2.1102311683,-3.8382162191,-2.9959744515  H,0,-1.1036323654,-4.233879003,-3.1483672337  H,0,-2.7286081983,-4.1956560233,-3.8269745636  H,0,-2.0529233714,-2.7510370278,-3.0693661156  C,0,2.8451058254,-3.2838515368,1.9142975552  H,0,1.8542966081,-2.8380231384,1.8224773504  H,0,2.8903780662,-4.1615586361,1.2684101471  H,0,2.9489891609,-3.6343603725,2.9472155689  C,0,3.829367999,-1.1004989088,2.5959508004  H,0,3.8973775938,-1.4888433694,3.6180132206  H,0,4.6279908548,-0.3671816984,2.4731227468  H,0,2.8714638463,-0.5858327602,2.510143741  C,0,5.3206931657,-2.942586814,1.8068691918  H,0,5.4182711075,-3.2465372876,2.8550925488  H,0,5.4363541377,-3.8410938033,1.199485831  H,0,6.1568008937,-2.2750954076,1.5867611843  C,0,3.6672991575,-4.1230554732,-1.5344129929  H,0,4.0227562438,-4.6597382047,-0.6534469505  H,0,2.5790169275,-4.0745068293,-1.4825878795  H,0,3.9254062244,-4.7301952535,-2.4094072461  C,0,5.8330074988,-2.8784674863,-1.7192031499  H,0,6.249345825,-3.3259921484,-0.8165306417  H,0,6.1021849426,-3.5291389449,-2.5586740165  H,0,6.3326468862,-1.921795478,-1.8799949429  C,0,3.8382162191,-2.1102311683,-2.9959744515  H,0,4.233879003,-1.1036323654,-3.1483672337  H,0,4.1956560233,-2.7286081983,-3.8269745636  H,0,2.7510370278,-2.0529233714,-3.0693661156  C,0,3.2838515368,2.8451058254,1.9142975552  H,0,2.8380231384,1.8542966081,1.8224773504  H,0,4.1615586361,2.8903780662,1.2684101471  H,0,3.6343603725,2.9489891609,2.9472155689  C,0,1.1004989088,3.829367999,2.5959508004  H,0,1.4888433694,3.8973775938,3.6180132206  H,0,0.3671816984,4.6279908548,2.4731227468  H,0,0.5858327602,2.8714638463,2.510143741  C,0,2.942586814,5.3206931657,1.8068691918  H,0,3.2465372876,5.4182711075,2.8550925488  H,0,3.8410938033,5.4363541377,1.199485831  H,0,2.2750954076,6.1568008937,1.5867611843  C,0,2.8784674863,5.8330074988,-1.7192031499  H,0,3.3259921484,6.249345825,-0.8165306417  H,0,3.5291389449,6.1021849426,-2.5586740165  H,0,1.921795478,6.3326468862,-1.8799949429  C,0,4.1230554732,3.6672991575,-1.5344129929  H,0,4.6597382047,4.0227562438,-0.6534469505  H,0,4.0745068293,2.5790169275,-1.4825878795  H,0,4.7301952535,3.9254062244,-2.4094072461  C,0,2.1102311683,3.8382162191,-2.9959744515  H,0,2.0529233714,2.7510370278,-3.0693661156  H,0,1.1036323654,4.233879003,-3.1483672337  H,0,2.7286081983,4.1956560233,-3.8269745636  Cl,0,0.,0.,2.5766197253 |
| **8′**, ClAl[Ge4(SiMe*t*Bu2)4], *C*1, NI = 0, *ω*1 = 9, E = -11592.198669  Ge,0,-0.1242618682,1.7345267376,-0.0656051929  Ge,0,-1.7402849368,-0.1384600485,-0.2859183071  Ge,0,0.1669453964,-1.6887252174,-0.2671399947  Ge,0,1.6954066039,0.1843316553,-0.830305972  Si,0,-0.4957825857,4.1428845939,-0.2759694925  Si,0,4.0889526123,0.4492357213,-0.14313959  Si,0,0.4375719117,-4.1203453355,-0.3090530801  Si,0,-4.1655272496,-0.4668303205,-0.099304946  Al,0,0.0593281386,-0.0426490828,1.6241102968  C,0,-2.3618840043,4.437660018,-0.3013379391  C,0,0.2033677664,4.7189287027,-1.9938975418  C,0,0.2222444144,5.0060189374,1.3077152038  C,0,4.6047496861,-0.1647293648,1.6323987037  C,0,5.0987154155,-0.3322464688,-1.6237903788  C,0,4.4197743983,2.3148366894,-0.2138006167  C,0,2.2983455109,-4.432449027,-0.4212559786  C,0,-0.3559008385,-4.7897690086,-1.9514992557  C,0,-0.2037986834,-4.8869358451,1.3551866714  C,0,-4.8286259622,0.2976485362,1.5587863955  C,0,-4.9563956094,0.1953994035,-1.7477006405  C,0,-4.4815642875,-2.3296232057,-0.0410201789  H,0,5.4409061705,2.5379217414,0.1065104166  H,0,2.5155093294,-5.4939807091,-0.2762099932  H,0,-5.5285603848,-2.5272557958,0.2038008082  H,0,-2.5775976733,5.5049939977,-0.205195426  H,0,3.7428209685,2.8694205471,0.4337485737  H,0,2.8486995451,-3.8749418225,0.33495931  H,0,-3.8671686692,-2.8207605342,0.711310751  H,0,-2.8657261984,3.9229932986,0.5146598854  H,0,4.3020944054,2.7015984183,-1.2270697352  H,0,2.6898658792,-4.147090679,-1.3979653642  H,0,-4.2739902031,-2.8013969509,-1.0016055843  H,0,-2.8046968996,4.0947719593,-1.2364377337  C,0,4.0322692468,0.8258747365,2.6634561133  H,0,4.2457220787,0.469236132,3.6766772414  H,0,4.4756307279,1.8181883254,2.5653418531  H,0,2.9494428591,0.9307765354,2.5847600131  C,0,6.1368086678,-0.1833964278,1.8015902688  H,0,6.3849766751,-0.4110574065,2.8445744248  H,0,6.6129568184,-0.9465936078,1.1849862394  H,0,6.5959115614,0.7789125437,1.5649458768  C,0,4.065203159,-1.567867223,1.9490080422  H,0,4.341924604,-1.8530478576,2.9700103732  H,0,2.9772268924,-1.6085836229,1.8830876447  H,0,4.4722730064,-2.3252543498,1.2773089464  C,0,5.150087152,-1.8656783125,-1.5448176235  H,0,5.6926797799,-2.218016754,-0.6662114094  H,0,4.1513538708,-2.304319951,-1.5185867515  H,0,5.6620558887,-2.2707661547,-2.425402981  C,0,4.4356987205,0.0559683949,-2.9601915181  H,0,4.3414071077,1.1376041096,-3.0794609783  H,0,5.046674788,-0.3100306322,-3.7934067672  H,0,3.4397478538,-0.376739875,-3.0693771252  C,0,6.5408869065,0.2142981242,-1.6541294388  H,0,7.1086684699,-0.0392606037,-0.7598077307  H,0,7.0748179328,-0.2139017008,-2.5103528864  H,0,6.565170446,1.2992674211,-1.7701412378  C,0,1.7390367863,4.7539996867,-2.0222109348  H,0,2.1495005951,5.4945595535,-1.3339305822  H,0,2.1724760865,3.7843539098,-1.7725056062  H,0,2.0865848054,5.018297846,-3.0271957878  C,0,-0.278880119,3.7450233949,-3.0869593499  H,0,-1.3677617105,3.6700548605,-3.1252495543  H,0,0.0558392589,4.1020127669,-4.0672745471  H,0,0.1210627235,2.7398278757,-2.946589434  C,0,-0.3357877073,6.1220799733,-2.3425260976  H,0,0.0373820055,6.4198400781,-3.3286881244  H,0,-1.4259752556,6.1435041582,-2.391156252  H,0,-0.0164530326,6.884993053,-1.6324352824  C,0,0.1920190615,6.5400086196,1.1624939069  H,0,0.4859227803,7.0032880569,2.110870301  H,0,0.8885476319,6.895629353,0.4019465682  H,0,-0.8021330863,6.9183806658,0.9143498519  C,0,-0.6647070131,4.6169512933,2.5072835439  H,0,-0.2552792535,5.0567698464,3.4229558144  H,0,-1.6877235004,4.9814587773,2.4004574477  H,0,-0.7032509524,3.5357101277,2.6556170197  C,0,1.662719011,4.5698859762,1.618182366  H,0,2.008643684,5.0587636448,2.5356064824  H,0,1.7315432293,3.4926639444,1.7792346472  H,0,2.3590684333,4.8395518611,0.8237407644  C,0,-4.3340350715,1.7339409068,1.7893362417  H,0,-4.7147231032,2.1083830195,2.7460382783  H,0,-3.2445041441,1.7823460405,1.831597772  H,0,-4.674689969,2.4192852739,1.0126541328  C,0,-4.3315549464,-0.5755301459,2.7276116542  H,0,-4.6624893595,-0.1398516138,3.6763936616  H,0,-4.7264741797,-1.5916762709,2.6808914443  H,0,-3.242065285,-0.6372555106,2.7607242193  C,0,-6.3700333125,0.2986965161,1.5823267148  H,0,-6.7197063675,0.6229112805,2.5687825942  H,0,-6.7941966869,0.9862879086,0.8493123048  H,0,-6.7928348198,-0.6920186833,1.4015435143  C,0,-4.1156680871,-0.3006505023,-2.940468086  H,0,-4.5912715167,0.0065974904,-3.8785326692  H,0,-3.1061321197,0.1147434068,-2.9321624811  H,0,-4.0274613651,-1.3889128217,-2.9638767891  C,0,-6.3863582508,-0.3574473631,-1.9184563955  H,0,-7.0613902507,-0.0308993665,-1.1273993214  H,0,-6.8031644845,-0.003365395,-2.867944815  H,0,-6.4042544808,-1.4483364022,-1.9456945025  C,0,-5.0047777336,1.7298785375,-1.7991336945  H,0,-5.6587001943,2.150106698,-1.033461774  H,0,-4.0141689678,2.1697511215,-1.6736327007  H,0,-5.3894899223,2.0596086457,-2.7707651481  C,0,0.0709269808,-3.8841822553,-3.1232981064  H,0,-0.3146397739,-2.8689432921,-3.0191913227  H,0,1.1562688735,-3.8189783291,-3.2247778993  H,0,-0.3184926848,-4.2932170482,-4.0622235881  C,0,0.1525011266,-6.2155014709,-2.2503174892  H,0,-0.2764059282,-6.5640899845,-3.1964080605  H,0,1.2381621257,-6.2503728036,-2.3571423602  H,0,-0.1320694945,-6.9344613533,-1.4821215068  C,0,-1.8905435033,-4.8082718131,-1.89298635  H,0,-2.2687982265,-5.5014764568,-1.1400303335  H,0,-2.2969329849,-3.8192771003,-1.6755278541  H,0,-2.2977392752,-5.1252870846,-2.8596784694  C,0,-0.2177555761,-6.4265225398,1.2808734762  H,0,-0.4657234427,-6.8370827535,2.2659493193  H,0,-0.9652477318,-6.8000760626,0.5795978056  H,0,0.7515251929,-6.8408962611,0.9948740617  C,0,0.760696334,-4.4693159621,2.482791535  H,0,0.4002924238,-4.8675946183,3.4372877086  H,0,1.7687793064,-4.8572502215,2.3283780643  H,0,0.8277269118,-3.3851962502,2.5891885601  C,0,-1.6135330559,-4.4007409766,1.7257245445  H,0,-1.9153146331,-4.834550066,2.6854714273  H,0,-1.6495413495,-3.315327961,1.8344181519  H,0,-2.3603672858,-4.6930018691,0.986981763  Cl,0,0.368873515,-0.1850669452,3.7299579433 | **8′**, ClAl[Ge4(SiMe*t*Bu2)4], *C*4, NI = 3, *ω*1 =*i*46, E = -11592.196890  Ge,0,-1.5932569252,0.6820949467,-0.4564487368  Ge,0,-0.6820949467,-1.5932569252,-0.4564487368  Ge,0,1.5932569252,-0.6820949467,-0.4564487368  Ge,0,0.6820949467,1.5932569252,-0.4564487368  Si,0,-3.8710720852,1.5430736517,-0.2265865625  Si,0,1.5430736517,3.8710720852,-0.2265865625  Si,0,3.8710720852,-1.5430736517,-0.2265865625  Si,0,-1.5430736517,-3.8710720852,-0.2265865625  Al,0,0.,0.,1.4694219223  C,0,-5.0120498105,0.0365247987,-0.2688962228  C,0,-4.2477201579,2.5832415148,-1.8268423684  C,0,-4.1229288016,2.4445841676,1.475154692  C,0,2.4445841676,4.1229288016,1.475154692  C,0,2.5832415148,4.2477201579,-1.8268423684  C,0,0.0365247987,5.0120498105,-0.2688962228  C,0,5.0120498105,-0.0365247987,-0.2688962228  C,0,4.2477201579,-2.5832415148,-1.8268423684  C,0,4.1229288016,-2.4445841676,1.475154692  C,0,-2.4445841676,-4.1229288016,1.475154692  C,0,-2.5832415148,-4.2477201579,-1.8268423684  C,0,-0.0365247987,-5.0120498105,-0.2688962228  H,0,0.3351959477,6.0385722614,-0.0409407486  H,0,6.0385722614,-0.3351959477,-0.0409407486  H,0,-0.3351959477,-6.0385722614,-0.0409407486  H,0,-6.0385722614,0.3351959477,-0.0409407486  H,0,-0.7176766675,4.71770681,0.4582824036  H,0,4.71770681,0.7176766675,0.4582824036  H,0,0.7176766675,-4.71770681,0.4582824036  H,0,-4.71770681,-0.7176766675,0.4582824036  H,0,-0.4301107669,5.0151178764,-1.2542766078  H,0,5.0151178764,0.4301107669,-1.2542766078  H,0,0.4301107669,-5.0151178764,-1.2542766078  H,0,-5.0151178764,-0.4301107669,-1.2542766078  C,0,-3.023001117,3.4765149405,1.7661217117  H,0,-2.034205255,3.0158508689,1.7840404716  H,0,-3.0099907333,4.2836037111,1.0330391558  H,0,-3.1899347321,3.9298229729,2.7493843571  C,0,-5.4894054382,3.1564096673,1.5212961753  H,0,-6.3209849237,2.4829236809,1.3025669183  H,0,-5.6567315823,3.5586208292,2.5266356003  H,0,-5.5420095226,3.9957927493,0.8264814225  C,0,-4.0955038708,1.3828906273,2.5920084715  H,0,-4.2043502132,1.8729476791,3.5653694953  H,0,-4.9098658584,0.6623796726,2.4976003492  H,0,-3.1541354893,0.8307417659,2.6116872546  C,0,-5.7710014522,2.7623884749,-1.9957053234  H,0,-6.223083267,3.3243253523,-1.1784790538  H,0,-5.9731794306,3.3139985292,-2.9204827695  H,0,-6.289378577,1.804932451,-2.0711807237  C,0,-3.726469305,1.8259762196,-3.0636549097  H,0,-2.6399844051,1.7271171234,-3.0569944429  H,0,-4.1500938269,0.8227380377,-3.1471835131  H,0,-4.0057014053,2.3727970236,-3.9712652246  C,0,-3.5813742837,3.9673519477,-1.7940169505  H,0,-3.977389293,4.5979872064,-0.9966956862  H,0,-2.5006582618,3.8951139864,-1.6599631221  H,0,-3.7592455022,4.4910169707,-2.7401107321  C,0,-1.3828906273,-4.0955038708,2.5920084715  H,0,-1.8729476791,-4.2043502132,3.5653694953  H,0,-0.6623796726,-4.9098658584,2.4976003492  H,0,-0.8307417659,-3.1541354893,2.6116872546  C,0,-3.1564096673,-5.4894054382,1.5212961753  H,0,-3.5586208292,-5.6567315823,2.5266356003  H,0,-3.9957927493,-5.5420095226,0.8264814225  H,0,-2.4829236809,-6.3209849237,1.3025669183  C,0,-3.4765149405,-3.023001117,1.7661217117  H,0,-3.0158508689,-2.034205255,1.7840404716  H,0,-4.2836037111,-3.0099907333,1.0330391558  H,0,-3.9298229729,-3.1899347321,2.7493843571  C,0,-3.9673519477,-3.5813742837,-1.7940169505  H,0,-4.5979872064,-3.977389293,-0.9966956862  H,0,-3.8951139864,-2.5006582618,-1.6599631221  H,0,-4.4910169707,-3.7592455022,-2.7401107321  C,0,-2.7623884749,-5.7710014522,-1.9957053234  H,0,-3.3243253523,-6.223083267,-1.1784790538  H,0,-3.3139985292,-5.9731794306,-2.9204827695  H,0,-1.804932451,-6.289378577,-2.0711807237  C,0,-1.8259762196,-3.726469305,-3.0636549097  H,0,-0.8227380377,-4.1500938269,-3.1471835131  H,0,-2.3727970236,-4.0057014053,-3.9712652246  H,0,-1.7271171234,-2.6399844051,-3.0569944429  C,0,3.023001117,-3.4765149405,1.7661217117  H,0,2.034205255,-3.0158508689,1.7840404716  H,0,3.0099907333,-4.2836037111,1.0330391558  H,0,3.1899347321,-3.9298229729,2.7493843571  C,0,4.0955038708,-1.3828906273,2.5920084715  H,0,4.2043502132,-1.8729476791,3.5653694953  H,0,4.9098658584,-0.6623796726,2.4976003492  H,0,3.1541354893,-0.8307417659,2.6116872546  C,0,5.4894054382,-3.1564096673,1.5212961753  H,0,5.6567315823,-3.5586208292,2.5266356003  H,0,5.5420095226,-3.9957927493,0.8264814225  H,0,6.3209849237,-2.4829236809,1.3025669183  C,0,3.5813742837,-3.9673519477,-1.7940169505  H,0,3.977389293,-4.5979872064,-0.9966956862  H,0,2.5006582618,-3.8951139864,-1.6599631221  H,0,3.7592455022,-4.4910169707,-2.7401107321  C,0,5.7710014522,-2.7623884749,-1.9957053234  H,0,6.223083267,-3.3243253523,-1.1784790538  H,0,5.9731794306,-3.3139985292,-2.9204827695  H,0,6.289378577,-1.804932451,-2.0711807237  C,0,3.726469305,-1.8259762196,-3.0636549097  H,0,4.1500938269,-0.8227380377,-3.1471835131  H,0,4.0057014053,-2.3727970236,-3.9712652246  H,0,2.6399844051,-1.7271171234,-3.0569944429  C,0,3.4765149405,3.023001117,1.7661217117  H,0,3.0158508689,2.034205255,1.7840404716  H,0,4.2836037111,3.0099907333,1.0330391558  H,0,3.9298229729,3.1899347321,2.7493843571  C,0,1.3828906273,4.0955038708,2.5920084715  H,0,1.8729476791,4.2043502132,3.5653694953  H,0,0.6623796726,4.9098658584,2.4976003492  H,0,0.8307417659,3.1541354893,2.6116872546  C,0,3.1564096673,5.4894054382,1.5212961753  H,0,3.5586208292,5.6567315823,2.5266356003  H,0,3.9957927493,5.5420095226,0.8264814225  H,0,2.4829236809,6.3209849237,1.3025669183  C,0,2.7623884749,5.7710014522,-1.9957053234  H,0,3.3243253523,6.223083267,-1.1784790538  H,0,3.3139985292,5.9731794306,-2.9204827695  H,0,1.804932451,6.289378577,-2.0711807237  C,0,3.9673519477,3.5813742837,-1.7940169505  H,0,4.5979872064,3.977389293,-0.9966956862  H,0,3.8951139864,2.5006582618,-1.6599631221  H,0,4.4910169707,3.7592455022,-2.7401107321  C,0,1.8259762196,3.726469305,-3.0636549097  H,0,1.7271171234,2.6399844051,-3.0569944429  H,0,0.8227380377,4.1500938269,-3.1471835131  H,0,2.3727970236,4.0057014053,-3.9712652246  Cl,0,0.,0.,3.6082586229 |
| **9′**, ClGa[Ge4(SiMe*t*Bu2)4], *C*1, NI = 0, *ω*1 = 15, E = -13274.631596  Ge,0,-1.7262248801,0.0896235084,-0.0380138056  Ge,0,-0.0356642763,-1.7344165966,-0.262258658  Ge,0,1.7065285275,0.022475503,-0.2204086139  Ge,0,0.0000548719,1.7142477813,-0.8722661353  Si,0,-4.1719658323,-0.0337275813,-0.1396571292  Si,0,-0.010368485,4.1325708119,-0.2183947277  Si,0,4.1558061597,0.0082365777,-0.2542604169  Si,0,0.0235221884,-4.1911900923,-0.1117752076  Ga,0,0.0549836418,0.0389960307,1.6717003929  C,0,-4.6692947851,-1.8546266893,-0.0464641137  C,0,-4.7288783931,0.636193447,-1.8767493211  C,0,-4.8873995926,0.8543524643,1.4314497582  C,0,0.5854135618,4.604916168,1.5745492986  C,0,0.9362321777,5.0225138521,-1.6802085084  C,0,-1.8226210837,4.6706491124,-0.378974645  C,0,4.6786821241,1.824193867,-0.2461000506  C,0,4.7389270661,-0.7566167073,-1.9438680861  C,0,4.8318844418,-0.8156388795,1.3682322072  C,0,-0.7010886593,-4.7798587607,1.5901050347  C,0,-0.8312472334,-4.8844708648,-1.7159428584  C,0,1.8393109265,-4.7073942238,-0.1913549724  H,0,-1.9411850896,5.7217524958,-0.1024264152  H,0,5.7516693876,1.9096206653,-0.0563141942  H,0,1.9359156923,-5.7811025566,-0.010224462  H,0,-5.7461153136,-1.942198403,0.1194001674  H,0,-2.4764432608,4.0848748179,0.2648068638  H,0,4.1592100984,2.3905579522,0.5254074204  H,0,2.4428361685,-4.1901648009,0.5516714038  H,0,-4.1667781296,-2.3725206674,0.7688236138  H,0,-2.1798259453,4.5602196107,-1.4041846132  H,0,4.475772837,2.3018979487,-1.2047071976  H,0,2.2683623775,-4.4985705615,-1.1717898526  H,0,-4.43544596,-2.3802821259,-0.9721694204  C,0,-0.4976774131,4.1468791919,2.5687156114  H,0,-0.165279647,4.3427827886,3.5935749176  H,0,-1.4380874595,4.6804865154,2.4208666582  H,0,-0.6988559336,3.077399134,2.4985691983  C,0,0.7529934576,6.1289134959,1.7282082865  H,0,0.9564919215,6.3689895546,2.7780207264  H,0,1.5885020423,6.5148307728,1.142931186  H,0,-0.1451045046,6.6799433822,1.4409156094  C,0,1.9128763531,3.9290820129,1.9502824715  H,0,2.1885035616,4.1936100378,2.9771103368  H,0,1.8423715047,2.8418871502,1.9035782034  H,0,2.7312577843,4.2443370818,1.3012816192  C,0,2.4616707089,4.9006699878,-1.5455283455  H,0,2.8423220999,5.4093822508,-0.6585423379  H,0,2.7821468161,3.8590317249,-1.4952053008  H,0,2.9534900679,5.352842476,-2.4146381234  C,0,0.5223356253,4.3887471936,-3.0232028276  H,0,-0.5582006911,4.4144465102,-3.1806780548  H,0,0.9834333141,4.9431963361,-3.8487681516  H,0,0.8438423337,3.3488308518,-3.1080101153  C,0,0.5613135577,6.5175399713,-1.7458564977  H,0,0.8421733722,7.0639836621,-0.846423187  H,0,1.0816035024,6.9877185239,-2.5884105865  H,0,-0.508215332,6.6646787271,-1.9059017755  C,0,-4.5771688042,2.1603067228,-1.9955578701  H,0,-5.2285507385,2.6976186646,-1.304614598  H,0,-3.5508693422,2.4815346321,-1.8102953466  H,0,-4.8424258397,2.4831076495,-3.0084980656  C,0,-3.8618008635,-0.0220264895,-2.9678293816  H,0,-3.9180424693,-1.1123809335,-2.942330693  H,0,-4.2120401439,0.2974282638,-3.9555547859  H,0,-2.8115760497,0.2611619072,-2.8821459468  C,0,-6.1988505539,0.2536638455,-2.1457906246  H,0,-6.4880358843,0.5976042961,-3.1452078731  H,0,-6.3544554099,-0.8264503814,-2.1199447026  H,0,-6.8891304156,0.708771312,-1.4354619206  C,0,-6.4196339572,0.9882684253,1.3360738185  H,0,-6.8122123677,1.3783080708,2.2816617525  H,0,-6.7249067177,1.6816221314,0.5509325641  H,0,-6.9141903931,0.0314814716,1.1534973017  C,0,-4.5525941458,-0.0106703613,2.6630601909  H,0,-4.9212256525,0.4839886208,3.567968325  H,0,-5.0209992737,-0.9952130388,2.6167535671  H,0,-3.4766929217,-0.150979124,2.7860335349  C,0,-4.2835825585,2.2496510595,1.6500014967  H,0,-4.6988304666,2.6955597286,2.5604901579  H,0,-3.2008140176,2.2044932697,1.7766737742  H,0,-4.5021578885,2.9298624484,0.8264426087  C,0,-2.0681011779,-4.1495675641,1.9005483245  H,0,-2.4192728863,-4.490648377,2.8806908272  H,0,-2.0092284091,-3.0603028724,1.9383162552  H,0,-2.8292614195,-4.4230064057,1.1692270231  C,0,0.2806487145,-4.3687828275,2.7049839237  H,0,-0.1275357748,-4.6624068809,3.6779073218  H,0,1.2527745503,-4.8535815389,2.6005106586  H,0,0.4410001675,-3.2890980237,2.7332824493  C,0,-0.8446476024,-6.3143232142,1.6156572803  H,0,-1.1466292494,-6.6372896057,2.6180674931  H,0,-1.6058487013,-6.6700854554,0.92003767  H,0,0.0920644381,-6.8255358529,1.3823860737  C,0,-0.3607717443,-4.0635101585,-2.9327823074  H,0,-0.7759360673,-4.4948634331,-3.8505103828  H,0,-0.6927083513,-3.0243621597,-2.8819222846  H,0,0.7261263946,-4.0630456444,-3.0396483348  C,0,-0.4142064559,-6.3510756597,-1.9489737658  H,0,-0.7216759886,-7.0100432546,-1.136660846  H,0,-0.8858270708,-6.723309647,-2.8653512364  H,0,0.664386973,-6.4557450499,-2.0763461554  C,0,-2.3634951447,-4.8087958388,-1.6466353137  H,0,-2.7739852406,-5.4491246096,-0.8646068556  H,0,-2.7111670759,-3.7912021978,-1.4643002614  H,0,-2.797339251,-5.13874333,-2.597205757  C,0,3.900209784,-0.1480570986,-3.0846577571  H,0,2.845538762,-0.4165577467,-3.0065679888  H,0,3.9649630973,0.9415892665,-3.1143149422  H,0,4.2670787428,-0.5207921151,-4.0474556064  C,0,6.217771357,-0.4070813855,-2.2092870303  H,0,6.5161297532,-0.8008619697,-3.1874200423  H,0,6.3873774719,0.6709260733,-2.2315449564  H,0,6.8924312287,-0.8369754738,-1.4689467184  C,0,4.5674710831,-2.2824215174,-1.9850870951  H,0,5.2071640137,-2.7916579705,-1.262785176  H,0,3.5350843673,-2.576576845,-1.7874566656  H,0,4.8327190019,-2.6621276499,-2.9781558041  C,0,6.3625470399,-0.9795861226,1.2939175517  H,0,6.7390732763,-1.3315031256,2.2607003657  H,0,6.6630581836,-1.7133527278,0.544728563  H,0,6.8748627612,-0.0405939213,1.0727057459  C,0,4.501649566,0.1081877144,2.5574000331  H,0,4.8653485686,-0.3480955931,3.4844315707  H,0,4.978661169,1.0855579397,2.4681336904  H,0,3.4277310702,0.2638406261,2.6731378762  C,0,4.2049285003,-2.1904645322,1.6435171057  H,0,4.6063068024,-2.601356847,2.5765660147  H,0,3.1220144992,-2.1229297829,1.7594644003  H,0,4.4191893762,-2.9095659997,0.8525680261  Cl,0,0.2440033394,0.4801694405,3.8118934787 | **9′**, ClGa[Ge4(SiMe*t*Bu2)4], *C*4, NI = 3, *ω*1 = *i*50, E = -13274.629177  Ge,0,-1.601352607,0.6780194278,-0.5459818948  Ge,0,-0.6780194278,-1.601352607,-0.5459818948  Ge,0,1.601352607,-0.6780194278,-0.5459818948  Ge,0,0.6780194278,1.601352607,-0.5459818948  Si,0,-3.8799553332,1.5342438989,-0.2838926772  Si,0,1.5342438989,3.8799553332,-0.2838926772  Si,0,3.8799553332,-1.5342438989,-0.2838926772  Si,0,-1.5342438989,-3.8799553332,-0.2838926772  Ga,0,0.,0.,1.3787037706  C,0,-5.018540081,0.0262317218,-0.3316909121  C,0,-4.2665796769,2.5868761816,-1.8734227356  C,0,-4.114906572,2.4206885435,1.4269316053  C,0,2.4206885435,4.114906572,1.4269316053  C,0,2.5868761816,4.2665796769,-1.8734227356  C,0,0.0262317218,5.018540081,-0.3316909121  C,0,5.018540081,-0.0262317218,-0.3316909121  C,0,4.2665796769,-2.5868761816,-1.8734227356  C,0,4.114906572,-2.4206885435,1.4269316053  C,0,-2.4206885435,-4.114906572,1.4269316053  C,0,-2.5868761816,-4.2665796769,-1.8734227356  C,0,-0.0262317218,-5.018540081,-0.3316909121  H,0,0.321512655,6.043866444,-0.0941340072  H,0,6.043866444,-0.321512655,-0.0941340072  H,0,-0.321512655,-6.043866444,-0.0941340072  H,0,-6.043866444,0.321512655,-0.0941340072  H,0,-0.7333497805,4.7181443954,0.3873565426  H,0,4.7181443954,0.7333497805,0.3873565426  H,0,0.7333497805,-4.7181443954,0.3873565426  H,0,-4.7181443954,-0.7333497805,0.3873565426  H,0,-0.4323316013,5.027916668,-1.3209100913  H,0,5.027916668,0.4323316013,-1.3209100913  H,0,0.4323316013,-5.027916668,-1.3209100913  H,0,-5.027916668,-0.4323316013,-1.3209100913  C,0,1.3499885557,4.0759603615,2.5350224055  H,0,1.8325242872,4.1802470502,3.5125596196  H,0,0.6276531108,4.8887783913,2.4406538568  H,0,0.8018152798,3.1322844623,2.5452257039  C,0,3.1307803556,5.4817225165,1.4906628441  H,0,3.5235041952,5.640491368,2.5010899563  H,0,3.976740477,5.5416867801,0.8042921025  H,0,2.4582712635,6.3144811395,1.2733755634  C,0,3.4511687823,3.0130003821,1.7159244316  H,0,3.8972854885,3.1726656286,2.7035928632  H,0,2.9907489415,2.0240575491,1.7237770724  H,0,4.2634947104,3.0066025438,0.9884837453  C,0,3.9706230838,3.5998000446,-1.8335253657  H,0,4.5940790087,3.990011978,-1.0278139158  H,0,3.8972914867,2.5181047153,-1.7076596913  H,0,4.5024431009,3.7843584125,-2.7737529881  C,0,1.8394902552,3.7531415665,-3.1194595424  H,0,0.8359490065,4.1752037622,-3.2071506966  H,0,2.3921313477,4.0395031533,-4.0212941304  H,0,1.7430396426,2.6662411467,-3.121578835  C,0,2.7673517321,5.7908582493,-2.0307099546  H,0,3.3203557297,6.2374769249,-1.2044591678  H,0,3.3287085477,5.9992232583,-2.9482157919  H,0,1.8106026374,6.3095168588,-2.1127589475  C,0,-3.5998000446,3.9706230838,-1.8335253657  H,0,-3.990011978,4.5940790087,-1.0278139158  H,0,-2.5181047153,3.8972914867,-1.7076596913  H,0,-3.7843584125,4.5024431009,-2.7737529881  C,0,-3.7531415665,1.8394902552,-3.1194595424  H,0,-4.1752037622,0.8359490065,-3.2071506966  H,0,-4.0395031533,2.3921313477,-4.0212941304  H,0,-2.6662411467,1.7430396426,-3.121578835  C,0,-5.7908582493,2.7673517321,-2.0307099546  H,0,-5.9992232583,3.3287085477,-2.9482157919  H,0,-6.3095168588,1.8106026374,-2.1127589475  H,0,-6.2374769249,3.3203557297,-1.2044591678  C,0,-5.4817225165,3.1307803556,1.4906628441  H,0,-5.640491368,3.5235041952,2.5010899563  H,0,-5.5416867801,3.976740477,0.8042921025  H,0,-6.3144811395,2.4582712635,1.2733755634  C,0,-4.0759603615,1.3499885557,2.5350224055  H,0,-4.1802470502,1.8325242872,3.5125596196  H,0,-4.8887783913,0.6276531108,2.4406538568  H,0,-3.1322844623,0.8018152798,2.5452257039  C,0,-3.0130003821,3.4511687823,1.7159244316  H,0,-3.1726656286,3.8972854885,2.7035928632  H,0,-2.0240575491,2.9907489415,1.7237770724  H,0,-3.0066025438,4.2634947104,0.9884837453  C,0,-3.4511687823,-3.0130003821,1.7159244316  H,0,-3.8972854885,-3.1726656286,2.7035928632  H,0,-2.9907489415,-2.0240575491,1.7237770724  H,0,-4.2634947104,-3.0066025438,0.9884837453  C,0,-1.3499885557,-4.0759603615,2.5350224055  H,0,-1.8325242872,-4.1802470502,3.5125596196  H,0,-0.6276531108,-4.8887783913,2.4406538568  H,0,-0.8018152798,-3.1322844623,2.5452257039  C,0,-3.1307803556,-5.4817225165,1.4906628441  H,0,-3.5235041952,-5.640491368,2.5010899563  H,0,-3.976740477,-5.5416867801,0.8042921025  H,0,-2.4582712635,-6.3144811395,1.2733755634  C,0,-1.8394902552,-3.7531415665,-3.1194595424  H,0,-2.3921313477,-4.0395031533,-4.0212941304  H,0,-1.7430396426,-2.6662411467,-3.121578835  H,0,-0.8359490065,-4.1752037622,-3.2071506966  C,0,-2.7673517321,-5.7908582493,-2.0307099546  H,0,-3.3203557297,-6.2374769249,-1.2044591678  H,0,-3.3287085477,-5.9992232583,-2.9482157919  H,0,-1.8106026374,-6.3095168588,-2.1127589475  C,0,-3.9706230838,-3.5998000446,-1.8335253657  H,0,-4.5940790087,-3.990011978,-1.0278139158  H,0,-3.8972914867,-2.5181047153,-1.7076596913  H,0,-4.5024431009,-3.7843584125,-2.7737529881  C,0,3.7531415665,-1.8394902552,-3.1194595424  H,0,2.6662411467,-1.7430396426,-3.121578835  H,0,4.1752037622,-0.8359490065,-3.2071506966  H,0,4.0395031533,-2.3921313477,-4.0212941304  C,0,5.7908582493,-2.7673517321,-2.0307099546  H,0,5.9992232583,-3.3287085477,-2.9482157919  H,0,6.3095168588,-1.8106026374,-2.1127589475  H,0,6.2374769249,-3.3203557297,-1.2044591678  C,0,3.5998000446,-3.9706230838,-1.8335253657  H,0,3.990011978,-4.5940790087,-1.0278139158  H,0,2.5181047153,-3.8972914867,-1.7076596913  H,0,3.7843584125,-4.5024431009,-2.7737529881  C,0,5.4817225165,-3.1307803556,1.4906628441  H,0,5.640491368,-3.5235041952,2.5010899563  H,0,5.5416867801,-3.976740477,0.8042921025  H,0,6.3144811395,-2.4582712635,1.2733755634  C,0,4.0759603615,-1.3499885557,2.5350224055  H,0,4.1802470502,-1.8325242872,3.5125596196  H,0,4.8887783913,-0.6276531108,2.4406538568  H,0,3.1322844623,-0.8018152798,2.5452257039  C,0,3.0130003821,-3.4511687823,1.7159244316  H,0,3.1726656286,-3.8972854885,2.7035928632  H,0,2.0240575491,-2.9907489415,1.7237770724  H,0,3.0066025438,-4.2634947104,0.9884837453  Cl,0,0.,0.,3.5769264551 |
| **10′**, ClB[C4(SiMe3)4], *C*2, NI = 0, *ω*1 = 25, E = -4388.897268  Br,0,0.,0.,2.6289089549  B,0,0.,0.,0.6916098038  C,0,0.0949638516,-1.0486701727,-0.5681097496  Si,0,0.2381692108,-2.9084542952,-0.8521239245  C,0,-1.1210956836,-3.4267932293,-2.0507419209  H,0,-2.1302418102,-3.2737301522,-1.672860282  H,0,-1.015662141,-4.4898191393,-2.2841698278  H,0,-1.0297622445,-2.8734767321,-2.9885217314  C,0,0.1428773543,-3.8985030469,0.742652327  C,0,-1.0521143675,-0.0949498254,-0.5583591817  Si,0,-2.9127699538,-0.2553763324,-0.2845103778  C,0,-3.8183398654,-0.2143656886,-1.9329415119  H,0,-3.6650388582,0.7343911683,-2.4507685106  H,0,-3.4751891985,-1.0127547715,-2.5942623241  C,0,-3.5248798384,1.1238780837,0.843227671  H,0,-3.0637571276,1.0420299753,1.829604416  H,0,-3.3334437055,2.1274237651,0.4682503942  C,0,-3.3110623275,-1.8524588041,0.6328715515  H,0,-3.0987634707,-2.760275983,0.0706813667  H,0,-4.3788997629,-1.8602010805,0.8689840397  H,0,-2.7673353764,-1.902815318,1.5785192137  C,0,-0.0949638516,1.0486701727,-0.5681097496  Si,0,-0.2381692108,2.9084542952,-0.8521239245  C,0,-0.1428773543,3.8985030469,0.742652327  C,0,-1.8413573107,3.3026857606,-1.760892342  H,0,-2.7431402964,3.1546744632,-1.1696602591  H,0,-1.9310102514,2.7033703651,-2.6695674456  H,0,-1.8203662661,4.3535059792,-2.06297846  C,0,1.8413573107,-3.3026857606,-1.760892342  H,0,2.7431402964,-3.1546744632,-1.1696602591  H,0,1.8203662661,-4.3535059792,-2.06297846  H,0,1.9310102514,-2.7033703651,-2.6695674456  H,0,0.2259897262,-4.9693903809,0.5387327097  H,0,0.9504841441,-3.6240014915,1.4246159953  H,0,-0.7994890307,-3.730219006,1.2666948247  C,0,1.0521143675,0.0949498254,-0.5583591817  Si,0,2.9127699538,0.2553763324,-0.2845103778  C,0,3.8183398654,0.2143656886,-1.9329415119  H,0,3.4751891985,1.0127547715,-2.5942623241  H,0,3.6650388582,-0.7343911683,-2.4507685106  C,0,3.3110623275,1.8524588041,0.6328715515  H,0,2.7673353764,1.902815318,1.5785192137  H,0,4.3788997629,1.8602010805,0.8689840397  H,0,3.0987634707,2.760275983,0.0706813667  C,0,3.5248798384,-1.1238780837,0.843227671  H,0,3.3334437055,-2.1274237651,0.4682503942  H,0,4.6061287906,-1.0253979843,0.9747372278  H,0,3.0637571276,-1.0420299753,1.829604416  C,0,1.1210956836,3.4267932293,-2.0507419209  H,0,2.1302418102,3.2737301522,-1.672860282  H,0,1.0297622445,2.8734767321,-2.9885217314  H,0,1.015662141,4.4898191393,-2.2841698278  H,0,-4.8939609474,-0.3429010654,-1.7862126276  H,0,0.7994890307,3.730219006,1.2666948247  H,0,-0.9504841441,3.6240014915,1.4246159953  H,0,-0.2259897262,4.9693903809,0.5387327097  H,0,4.8939609474,0.3429010654,-1.7862126276  H,0,-4.6061287906,1.0253979843,0.9747372278 | |
